# Supplementary material for: Compliance with current VTE prophylaxis guidelines and risk factors linked to complications of VTE prophylaxis in medical inpatients: a prospective cohort study in a Spanish internal medicine department
Source: PubMed Central journal article supplement — BMJ Open. 2018 May 14;8(5):e021288. doi: 10.1136/bmjopen-2017-021288 (PMC5961602; doi:10.1136/bmjopen-2017-021288), 2018-05-14
Supplement: bmjopen-2017-021288.draft_revisions.pdf [file bmjopen-2017-021288.draft_revisions.pdf]

# BMJ Open

BMJ Open is committed to open peer review. As part of this commitment we make the peer review history of every article we publish publicly available.

When an article is published we post the peer reviewers' comments and the authors' responses online. We also post the versions of the paper that were used during peer review. These are the versions that the peer review comments apply to.

The versions of the paper that follow are the versions that were submitted during the peer review process. They are not the versions of record or the final published versions. They should not be cited or distributed as the published version of this manuscript.

BMJ Open is an open access journal and the full, final, typeset and author-corrected version of record of the manuscript is available on our site with no access controls, subscription charges or pay-per-view fees (<http://bmjopen.bmj.com>).

If you have any questions on BMJ Open's open peer review process please email [info.bmjopen@bmj.com](mailto:info.bmjopen@bmj.com)

# BMJ Open

## Fulfilment of current VTE prophylaxis guidelines and risk factors linked to complications of VTE prophylaxis in medical patients.

|                               |                                                                                                                                                                                                                                                                                                                                                                                                                                                                                                                                                                                        |
|-------------------------------|----------------------------------------------------------------------------------------------------------------------------------------------------------------------------------------------------------------------------------------------------------------------------------------------------------------------------------------------------------------------------------------------------------------------------------------------------------------------------------------------------------------------------------------------------------------------------------------|
| Journal:                      | <i>BMJ Open</i>                                                                                                                                                                                                                                                                                                                                                                                                                                                                                                                                                                        |
| Manuscript ID                 | bmjopen-2017-021288                                                                                                                                                                                                                                                                                                                                                                                                                                                                                                                                                                    |
| Article Type:                 | Research                                                                                                                                                                                                                                                                                                                                                                                                                                                                                                                                                                               |
| Date Submitted by the Author: | 19-Dec-2017                                                                                                                                                                                                                                                                                                                                                                                                                                                                                                                                                                            |
| Complete List of Authors:     | Novo-Veleiro, Ignacio; Complejo Hospitalario Universitario de Santiago de Compostela, Internal Medicine<br>Alvela-Suárez, Lucía; Hospital HM Rosaleda, Internal Medicine<br>Costa-Grille, Alba; Complejo Hospitalario Universitario de Santiago de Compostela, Internal Medicine<br>Suárez-Dono, Javier; Complejo Hospitalario Universitario de Santiago de Compostela, Internal Medicine<br>Ferrón-Vidan, Fernando; Complejo Hospitalario Universitario de Santiago de Compostela, Internal Medicine<br>Reino, Antonio; Complejo Hospitalario Universitario de Santiago de Compostela |
| Keywords:                     | Thromboembolism < CARDIOLOGY, GERIATRIC MEDICINE, Bleeding disorders & coagulopathies < HAEMATOLOGY                                                                                                                                                                                                                                                                                                                                                                                                                                                                                    |
|                               |                                                                                                                                                                                                                                                                                                                                                                                                                                                                                                                                                                                        |

SCHOLARONE™  
Manuscripts

Only

1  
2  
3 **Title:** Fulfilment of current VTE prophylaxis guidelines and risk factors linked to  
4 complications of VTE prophylaxis in medical patients.  
5  
6  
7

8  
9 **Authors:** Ignacio Novo-Veleiro<sup>1\*</sup>, Lucía Alvela-Suárez<sup>2</sup>, Alba Costa-Grille<sup>3</sup>, Javier  
10 Suárez-Dono<sup>1</sup>, Fernando Ferrón-Vidán<sup>1</sup>, Antonio Pose-Reino<sup>1</sup>.  
11  
12  
13

14  
15 **Filiations:**

16  
17 <sup>1</sup> Internal Medicine Department. University Hospital of Santiago de Compostela. A  
18 Coruña. Spain.  
19

20  
21 <sup>2</sup> Internal Medicine Department. HM Rosaleda Hospital. Santiago de Compostela. A  
22 Coruña. Spain.  
23

24  
25 <sup>3</sup> Geriatrics Department. University Hospital of Getafe. Madrid. Spain.  
26  
27  
28  
29  
30  
31  
32  
33  
34  
35  
36  
37  
38  
39  
40

41 **\*Corresponding author:** Ignacio Novo-Veleiro. Internal Medicine Department.  
42 University Hospital of Santiago de Compostela. A Coruña. Spain. 15701. Tlf.  
43 981951725. Email: ignacio.novo.veleiro@gmail.com.  
44  
45  
46  
47  
48  
49  
50  
51  
52  
53  
54  
55  
56  
57  
58  
59  
60

1  
2  
3 ABSTRACT:  
4

5 *Objectives:* the main objectives were to evaluate the grade of fulfillment of  
6 current guidelines regarding venous thromboembolism (VTE) prophylaxis in medical  
7 patients during admission and to identify risk factors linked to complications of this  
8 prophylaxis.  
9

10  
11  
12  
13  
14 *Design:* we conducted a prospective cohort study.  
15

16  
17 *Setting:* Internal Medicine Department of the University Hospital of Santiago de  
18 Compostela (third level institution).  
19

20  
21  
22 *Participants:* we included 396 hospitalized non-surgical patients with no active  
23 or previous oral anticoagulation or low molecular weight heparin (LMWH) treatment  
24 (during the previous year) and who received VTE prophylaxis during admission.  
25  
26

27  
28  
29 *Primary and secondary outcome measures:* the grade of fulfilment of current  
30 guidelines was estimated by calculating PADOVA and IMPROVE index in all cases.  
31 We analysed the development of the following complications: major and minor  
32 bleeding, major and minor hematoma and decrease of platelet count.  
33  
34  
35

36  
37  
38 *Results:* we found that VTE prophylaxis was correctly indicated in 88.4% of  
39 patients. We found 2 (0.5%) major bleeding, 17 (4.3%) minor bleeding, 30 (7.6%)  
40 platelet count decrease, 29 (7.3%) major hematoma and 82 (20.7%) minor hematoma.  
41 The presence of major hematomas was linked to obesity (OR=4.1; IC 95% 1.8–9.2;  $P =$   
42 0.001), concomitant antiplatelet treatment (OR=2.7; IC 95% 1.1–6.5;  $P = 0.03$ ) and  
43 enoxaparin use (OR=3.5; IC 95% 1.1–10.9;  $P = 0.029$ ) and the presence of minor  
44 hematomas was associated with PADOVA index < 4 points (OR=3.1; IC 95% 1.5–6.4;  
45  $P = 0.003$ ) and Diabetes Mellitus (OR=2; IC 95% 1.1–3.7;  $P = 0.031$ ).  
46  
47  
48  
49  
50  
51  
52  
53  
54  
55  
56  
57  
58  
59  
60

1  
2  
3 *Conclusions:* complications during VTE prophylaxis in elderly hospitalized  
4 medical patients are frequent despite a correct application of current guidelines. The  
5 main factors linked to hematomas were obesity and concomitant antiplatelet treatment  
6 and its presence should advise physicians to extreme precautions. The use of tinzaparin  
7 for VTE prophylaxis in these patients could have a better security profile.  
8  
9  
10  
11  
12

#### 13 14 15 16 STRENGTHS AND LIMITATIONS OF THIS STUDY:

##### 17 18 19 *Strengths:*

- 20 -Clinical study in elderly patients, usually excluded from large studies.
- 21
- 22 -Analysis of the fulfilment of current guidelines in VTE prophylaxis in real-life  
23 conditions.
- 24
- 25 -Detection of minor complications and risk factors usually undervalued in  
26 previous studies.
- 27
- 28
- 29
- 30
- 31
- 32

##### 33 34 35 *Limitations:*

- 36 -Observational study, which did not allow a correct homogenization of  
37 subgroups.
- 38
- 39
- 40
- 41 -The study was developed in only one department of a single hospital.
- 42
- 43
- 44
- 45
- 46

47 FUNDING STATEMENT: this research received no specific grant from any  
48 funding agency in the public, commercial or not-for-profit sectors.  
49  
50

51  
52  
53  
54 COMPETING INTERESTS STATEMENT: all authors declare no competing  
55 interests.  
56  
57

## INTRODUCTION:

Low molecular weight heparin (LMWH) use is extended in hospitalized patients since most of them met high-risk criteria for venous and pulmonary embolism [1]. These criteria have been re-defined by the American College of Chest Physicians and focused on calculate the risk of venous thromboembolism (VTE) development and the bleeding risk before starting VTE prophylaxis on both surgical and non-surgical inpatients [2,3]. In these sense, it is remarkable that the factors linked to a higher bleeding risk have been intensely analysed in patients who underwent to surgical procedures; but there are lack of data in the case of non-surgical patients [4]. Moreover, the apparition of some non-life-threatening secondary effects, like abdominal hematomas, has been poorly studied during VTE prophylaxis in non-surgical patients [5].

The adequacy of the real daily clinical practice to the current recommendations constitutes another interesting point of view. Previous studies showed an acceptable match between guidelines and clinical practice in surgical patients but, again, we can find only a few observational studies in non-surgical patients analysing this fact [1,6–8].

Thus, the aim of the present study was, in the one hand, to analyse the fulfilment of current VTE prophylaxis guidelines in non-surgical patients in an Internal Medicine Department and, in the other hand, to describe the incidence of major and minor secondary effects with LMWH prophylaxis and to detect potential risk factors linked to them.

PATIENTS AND METHODS:

The inclusion criteria were hospitalized non-surgical patients with no active or previous oral anticoagulation or LMWH treatment (during the previous year). There was no restriction regarding the cause of hospital admission. In all cases physicians indicated VTE prophylaxis with no intervention from the study staff. Written informed consent was request to all patients and the data collection was performed through a personal interview by trained staff and revision of their electronic medical history.

Age-adjusted Charlson's index (ACI) was used to assess the comorbidity degree of the included patients [9]. We also applied the Barthel's index (BI) to calculate the functional status [10], the CONUT Score (CS) to detect and establish nutritional deficiencies [11] and the Pfeiffer's test (PT) to conduct a mental status evaluation of all the included patients [12].

In light of current recommendations, the PADOVA index was calculated in all cases to check the adequacy of the clinical practice to guidelines [4]. VTE prophylaxis was considered as indicated with at least 4 points in PADOVA index [13]. In the other hand, the IMPROVE index was used to calculate the bleeding risk, considering as high-risk patients with at least 7 points [14].

Chronic Kidney Disease (CKD) was assessed in patients with decreased glomerular filtration rate (GFR) (<60 mL/min) for at least 3 months before the admission, following current guidelines [15]. Acute Kidney Injury (AKI) was considered in patients with GFR < 60 mL/min at admission without previous diagnosis of CKD. Patients with previous CKD and worsening of GFR at admission were coded as CKD exacerbation (CKDE). GFR was calculated using 2009 CKD-Epidemiology Collaboration (EPI) creatinine equation in all cases [16].

1  
2  
3           Regarding obesity, it was considered in all patients with a Body Mass Index  
4 (BMI) over 30 kg/m<sup>2</sup> and for the main alterations in blood count we applied World  
5 Health Association (WHO) criteria for anemia and we coded as thrombocytopenia at  
6 admission all patients with values under 120000/ $\mu$ L. Concerning coagulation tests  
7 alterations we considered them in all cases with an International Normalized Ratio  
8 (INR) over 1.2 or Activated Partial Thromboplastin Time (APTT) over 35 seconds.  
9  
10

11  
12           The available heparin types in our center during the study period were only  
13 enoxaparin and tinzaparin, so they are the only included heparins in our analysis.  
14  
15

16           In the case of the analysed complications, we defined them as follows:  
17  
18

19           -Major bleeding: gastrointestinal or intracranial bleeding, haemoptysis, epistaxis  
20 or haematuria with a decrease of at least 2 g/dL in haemoglobin level.  
21  
22

23           -Minor bleeding: haemoptysis, epistaxis or haematuria without analytical impact  
24 or with a decrease of less than 2 g/dL.  
25  
26

27           -Platelet count decrease: loss of at least 50% compared to the baseline value.  
28  
29

30           -Major hematoma: retroperitoneal or straight abdominal muscles locations were  
31 considered as major hematoma in all cases. We also considered as major hematoma an  
32 abdominal hematoma in other locations which implied a loss of at least 2 points in  
33 hemoglobin levels.  
34  
35

36           -Minor hematoma: abdominal wall hematoma (any location) with an extension  
37 of more than 5 cm without hemoglobin loss or with a hemoglobin loss lower than 2  
38 points. We also considered as minor hematoma all abdominal wall hematomas of any  
39 extension which caused symptoms like pain or pruritus which required specific  
40 treatment.  
41  
42  
43  
44  
45  
46  
47  
48  
49  
50  
51  
52  
53  
54  
55  
56  
57  
58  
59  
60



1  
2  
3 -Pulmonary embolism (PE) we coded all cases diagnosed during hospital stay  
4 which were undiagnosed an unsuspected at admission.  
5

6  
7 -Deep venous thrombosis (DVT): we considered all cases diagnosed during  
8 hospital stay which were undiagnosed an unsuspected at admission.  
9

10  
11 A descriptive analysis was performed, by calculating qualitative-variable rates  
12 plus mean and standard deviation. We used the Chi-square test or Fisher's exact test, as  
13 appropriate (expected frequency value <5), to compare qualitative variables, and the  
14 Student's t test for quantitative variables. A multivariate logistic regression analysis was  
15 conducted to identify factors associated with complications. A *P*-value <0.05 was  
16 regarded as significant. All analyses were performed using the SPSS v. 22.0 software  
17 package (SPSS Inc., Chicago, IL, USA).  
18  
19  
20  
21  
22  
23  
24  
25  
26  
27  
28  
29

### 30 RESULTS:

31  
32  
33 We included 396 consecutive inpatients that were given VTE prophylaxis during  
34 their hospital stay, of them, 51.8% were women and the mean age was 80.7 (Standard  
35 Deviation [SD] = 11.5) years old. Only 32 patients (8.1%) lived in nursing homes and  
36 the average scores of the different classification tools applied at admission were: ACI  
37 5.5 (SD = 2.2) points, BI 55.5 (SD = 35.5) points, PT 3.3 (SD = 3) mistakes and CS 6.2  
38 (SD = 2.6) points. CKD was present in 91 (23.2%) patients and Diabetes Mellitus in  
39 111 (28.3%) of them, as well as obesity (111 patients). Other remarkable comorbidities  
40 were active cancer (37 patients, 9.5%) and haematological diseases (9 patients, 2.5%)  
41  
42 The complete baseline characteristics and frequencies of the main thrombosis risk  
43 factors are detailed in Table 1.  
44  
45  
46  
47  
48  
49  
50  
51  
52  
53  
54  
55  
56  
57  
58  
59  
60

1  
2  
3 After the application of PADOVA index, we found that VTE prophylaxis was  
4 correctly indicated in 88.4% of patients, following these criteria. In the case of  
5 IMPROVE index, we found that 6.3% of patients had a high theoretical bleeding risk  
6 which should advise against VTE prophylaxis prescription. It is also remarkable that 22  
7 patients (5.7%) achieved both PADOVA and IMPROVE criteria, which means  
8 concomitant high VTE and bleeding risk. We only found 2 patients (0.5%) with less  
9 than 4 points in PADOVA index and high bleeding risk in IMPROVE index.  
10  
11  
12  
13  
14  
15  
16  
17

18 Regarding general condition at admission, 316 (79.8%) patients presented an  
19 infection, 155 (39.1%) had anemia, 137 (34.6%) had an acute heart failure, 95 (24%)  
20 met AKI criteria and 79 (19.9) met CKDE criteria. If we focus on platelet count and  
21 coagulation tests, 93 (23.5%) patients had an alteration on coagulation tests at  
22 admission and 27 (6.8%) thrombocytopenia.  
23  
24  
25  
26  
27  
28  
29

30 Considering the VTE prophylaxis, the most used LMWH was enoxaparin  
31 (69.7% of cases) followed by tinzaparin (30.3%) and the mean duration of it was 12  
32 (Standard Deviation [SD] = 11.8) days. The most commonly used treatment regimens  
33 were 4000 International Units (IU) daily for enoxaparin (219 patients) and 3500 IU  
34 daily for tinzaparin (103 patients). We did not register any episode of VTE during the  
35 study period.  
36  
37  
38  
39  
40  
41  
42

43 With regard to complications we found 2 patients (0.5%) who presented major  
44 bleeding, 17 (4.3%) a minor bleeding episode, 30 (7.6%) developed a platelet count  
45 decrease, 29 (7.3%) had a major hematoma and 82 (20.7%) a minor hematoma. All  
46 patients who developed complications were managed through conservative treatment  
47 and the evolution was favourable in all cases. After the univariate analysis, we found an  
48 association between minor bleeding and the presence of anemia at admission and AKI.  
49  
50  
51  
52  
53  
54  
55  
56 In the case of major hematomas, this analysis showed significant differences in patients  
57  
58  
59  
60

1  
2  
3 with obesity, concomitant antiplatelet treatment, an infection or heart failure as main  
4  
5 cause of admission and the use of enoxaparin. With regard to minor hematomas, we  
6  
7 found an association with diabetes and a PADOVA index lower than 4 points. Finally, a  
8  
9 platelet count decrease was only linked to an infection as cause of admission.  
10

11  
12 After performing a multivariable analysis none variable showed association with  
13  
14 minor bleeding or platelet count decrease, the presence of major hematomas was linked  
15  
16 to obesity (OR = 4.1; IC 95% 1.8 – 9.2;  $P = 0.001$ ), concomitant antiplatelet treatment  
17  
18 (OR = 2.7; IC 95% 1.1 – 6.5;  $P = 0.03$ ) and enoxaparin use (OR = 3.5; IC 95% 1.1 –  
19  
20 10.9;  $P = 0.029$ ) and the presence of minor hematomas was associated with the absence  
21  
22 of indication of VTE prophylaxis following recommendations (PADOVA index < 4  
23  
24 points) (OR = 3.1; IC 95% 1.5 – 6.4;  $P = 0.003$ ) and the presence of Diabetes Mellitus  
25  
26 (OR = 2; IC 95% 1.1 – 3.7;  $P = 0.031$ ).  
27  
28

29  
30 In view of these results, we performed a sub-analysis to compare the clinical  
31  
32 profile of patients who received enoxaparin and tinzaparin, which showed significant  
33  
34 differences only regarding renal function, as it is showed in Table 1.  
35  
36  
37  
38

### 39 DISCUSSION:

40  
41  
42 The present study shows, for the first time to our knowledge, an exhaustive  
43  
44 analysis of clinically relevant complications during VTE prophylaxis and the main risk  
45  
46 factors linked to them.  
47  
48

49  
50 If we focus on the adaptation of the clinical practice to current guidelines, it is  
51  
52 remarkable the high grade of adaptation observed, despite the existence of a narrow  
53  
54 margin for improvement. Our study included only patients with VTE prophylaxis  
55  
56 during hospital stay, which makes difficult the comparison with studies like ENDORSE  
57  
58

1  
2  
3 or AVAIL ME, which showed lower percentages of correct application of  
4  
5 recommendations, even under 50% [17,18].  
6

7  
8 Another relevant difference of our study is the exclusive inclusion of medical  
9  
10 patients and the extremely high age and grade of comorbidity of our cohort, compared  
11  
12 with larger series, which included patients with a mean age more than 10 years lower  
13  
14 and very low rates of multiple comorbidity [19,20].  
15

16  
17 The absence of VTE cases in our study reflects a high efficacy of VTE  
18  
19 prophylaxis in medical patients, which has been largely studied and supported by high-  
20  
21 quality evidence [21,22].  
22

23  
24 Regarding complications, it is remarkable that we have analyzed minor  
25  
26 complications, like hematomas, that usually are undervalued by physicians, but have an  
27  
28 important relevance for patients. Thus, we consider that our results could help  
29  
30 physicians to improve their daily clinical practice and the patient's experience during a  
31  
32 hospital admission.  
33

34  
35 If we focus on bleeding episodes, they were infrequent, but the association  
36  
37 between anemia and minor bleeding could reflect the existence of previous digestive  
38  
39 bleeding, increased during admission by LMWH, and the association with AKI could be  
40  
41 due to a heparin over effect in these patients, although we did not detect significant rates  
42  
43 of unadjusted dosage in our cohort. In fact, an increased bleeding risk was one of the  
44  
45 main risk factors considered on IMPROVE score, although anemia was not a useful  
46  
47 marker of bleeding risk in that study [14]. Thus, our results could contribute to expand  
48  
49 the available tools to identify patients with high bleeding risk before prescribing VTE  
50  
51 prophylaxis.  
52  
53  
54  
55  
56  
57  
58  
59  
60

1  
2  
3 In the case of major hematomas, we must highlight the relative high percentage  
4 of patients who developed these complications. Despite the clinical relevance of  
5 abdominal and retroperitoneal hematomas, large series did not analyze these  
6 complications and we only can compare our results with small series and case reports  
7 [14,18,23,24]. In this sense, previous reports suggested an estimated incidence of 5%  
8 for abdominal hematomas in patients receiving VTE prophylaxis, which could be  
9 comparable to ours [25]. With regard to risk factors, previous studies showed that  
10 elderly patients had a higher risk of abdominal hematomas [23,25,26]; we did not  
11 identify this association, probably due to the absence of patients with ages lower than 65  
12 years old. Concomitant antiplatelet treatment has been identify as a risk factors linked to  
13 hematomas by other authors, due to the synergic action with LMWH [23,25,26].  
14 Obesity has also been described as a risk factor in previous studies [25,27], and this  
15 relationship could be due to an adipose tissue dysfunction in obese patients, linked to an  
16 abnormal subcutaneous vascularization and extracellular matrix changes [28–30]. These  
17 alterations lead to a higher risk of local hematomas in obese patients under VTE  
18 prophylaxis, independently of the plasmatic levels of HBPM achieved [26].  
19  
20  
21  
22  
23  
24  
25  
26  
27  
28  
29  
30  
31  
32  
33  
34  
35  
36  
37

38 If we focus on the different HBPM used in our study we found a lower risk of  
39 major hematomas with tinzaparin as the only significant difference. It is remarkable that  
40 the characteristics of patients treated with both of them were different regarding renal  
41 function, so the use of tinzaparin in patients with poorer renal function could have alert  
42 physicians to a better dose adjustment. Thus, it could be considered as a potential  
43 selection bias which should be taken into account during the interpretation of our  
44 results. Despite this, a potential superior security profile in elderly patients with high  
45 comorbidity emerges and even differences in device, needles and mode of  
46  
47  
48  
49  
50  
51  
52  
53  
54  
55  
56  
57  
58  
59  
60

1  
2  
3 administration should be considered. Further studies will be necessary to properly  
4  
5 establish this difference.  
6

7  
8 If we focus on minor hematomas, it is remarkable that is a complication usually  
9  
10 not considered as clinically relevant; despite this, we decided to include it due to the  
11  
12 perception that it is completely relevant for our patients. In this sense, the association  
13  
14 with a PADOVA index lower than 4 points cannot be considered as a risk factor itself  
15  
16 but helps us to highlight the importance of a correct application of VTE prophylaxis  
17  
18 guidelines. In the case of Diabetes Mellitus, it has not been previously described as a  
19  
20 risk factor for abdominal hematomas development but microvascular diabetic  
21  
22 complications might underlie this association [25].  
23  
24  
25  
26  
27

#### 28 CONCLUSIONS:

29  
30 The development of complications during VTE prophylaxis in elderly  
31  
32 hospitalized medical patients is higher than expected in other populations despite a  
33  
34 correct application of current guidelines. The main factors linked to hematomas in our  
35  
36 cohort were obesity and concomitant antiplatelet treatment and its presence should  
37  
38 advise physicians to extreme precautions. The use of tinzaparin for VTE prophylaxis in  
39  
40 these patients could have a better security profile.  
41  
42  
43  
44  
45  
46

#### 47 AUTHOR'S CONTRIBUTIONS:

48  
49 -Study concept and design: Drs. Antonio Pose-Reino, Ignacio Novo-Veleiro  
50  
51 and Lucía Alvela-Suárez.  
52

53  
54 -Acquisition of subjects and/or data: Drs. Ignacio Novo-Veleiro, Lucía  
55  
56 Alvela-Suárez and Alba Costa-Grille.  
57

1  
2  
3 -Analysis and interpretation of data: Drs. Ignacio Novo-Veleiro, Javier  
4  
5 Suárez-Dono, Fernando Ferrón-Vidán and Antonio Pose-Reino.

6  
7 -Preparation of manuscript: Drs. Ignacio Novo-Veleiro, Lucía Alvela-Suárez  
8  
9 and Antonio Pose-Reino.

10  
11  
12  
13  
14 DATA SHARING STATEMENT: Technical appendix, statistical code, and  
15  
16 dataset will be available from the Dryad repository if required.  
17  
18  
19  
20  
21  
22  
23  
24  
25  
26  
27  
28  
29  
30  
31  
32  
33  
34  
35  
36  
37  
38  
39  
40  
41  
42  
43  
44  
45  
46  
47  
48  
49  
50  
51  
52  
53  
54  
55  
56  
57  
58  
59  
60

## REFERENCES

- 1 Nieto Rodríguez JA, ENDORSE. [Venous thromboembolism risk and antithrombotic prophylaxis among patients admitted to Spanish hospitals (ENDORSE study)]. *Med Clin (Barc)* 2009;**133**:1–7. doi:10.1016/j.medcli.2009.01.040
- 2 Gould MK, Garcia DA, Wren SM, *et al.* Prevention of VTE in nonorthopedic surgical patients: Antithrombotic Therapy and Prevention of Thrombosis, 9th ed: American College of Chest Physicians Evidence-Based Clinical Practice Guidelines. *Chest* 2012;**141**:e227S–e277S. doi:10.1378/chest.11-2297
- 3 Falck-Ytter Y, Francis CW, Johanson NA, *et al.* Prevention of VTE in orthopedic surgery patients: Antithrombotic Therapy and Prevention of Thrombosis, 9th ed: American College of Chest Physicians Evidence-Based Clinical Practice Guidelines. *Chest* 2012;**141**:e278S–e325S. doi:10.1378/chest.11-2404
- 4 Kahn SR, Lim W, Dunn AS, *et al.* Prevention of VTE in nonsurgical patients: Antithrombotic Therapy and Prevention of Thrombosis, 9th ed: American College of Chest Physicians Evidence-Based Clinical Practice Guidelines. *Chest* 2012;**141**:e195S–e226S. doi:10.1378/chest.11-2296
- 5 Decousus H, Tapson VF, Bergmann J-F, *et al.* Factors at admission associated with bleeding risk in medical patients: findings from the IMPROVE investigators. *Chest* 2011;**139**:69–79. doi:10.1378/chest.09-3081
- 6 Ruiz-Artacho P, Pérez Peña C, Iriarte A, *et al.* [Adequation of thromboprophylaxis during former admission in patients attended in emergencies with thromboembolic disease]. *Med Clin (Barc)* 2013;**141**:130–1. doi:10.1016/j.medcli.2012.12.014
- 7 Gallardo Jiménez P, Guijarro Merino R, Vallejo Herrera V, *et al.* [Assessment of venous thromboembolism risk in hospitalized medical patients. Concordance between PRETEMED guide and the recommendations of the viii conference of the American College of Chest Physicians]. *Med Clin (Barc)* 2012;**139**:467–72. doi:10.1016/j.medcli.2011.07.022
- 8 Borobia AM, Fernández Capitán C, Iniesta Arandia N, *et al.* [Risk of thromboembolic events and evaluation of the use of venous thromboembolism prophylaxis in hospitalized medical patients and after discharge]. *Rev Clin Esp* 2009;**209**:15–20.
- 9 Charlson ME, Pompei P, Ales KL, *et al.* A new method of classifying prognostic comorbidity in longitudinal studies: development and validation. *J Chronic Dis* 1987;**40**:373–83.
- 10 Mahoney FI, Barthel DW. FUNCTIONAL EVALUATION: THE BARTHEL INDEX. *Md State Med J* 1965;**14**:61–5.
- 11 Ignacio de Ulíbarri J, González-Madroño A, de Villar NGP, *et al.* CONUT: a tool for controlling nutritional status. First validation in a hospital population. *Nutr Hosp* 2005;**20**:38–45.



- 12 Pfeiffer E. A short portable mental status questionnaire for the assessment of organic brain deficit in elderly patients. *J Am Geriatr Soc* 1975;**23**:433–41.
- 13 Barbar S, Noventa F, Rossetto V, *et al*. A risk assessment model for the identification of hospitalized medical patients at risk for venous thromboembolism: the Padua Prediction Score. *J Thromb Haemost JTH* 2010;**8**:2450–7. doi:10.1111/j.1538-7836.2010.04044.x
- 14 Hostler DC, Marx ES, Moores LK, *et al*. Validation of the International Medical Prevention Registry on Venous Thromboembolism Bleeding Risk Score. *Chest* 2016;**149**:372–9. doi:10.1378/chest.14-2842
- 15 National Guideline Clearinghouse (NGC). Guideline summary: KDIGO 2012 clinical practice guideline for the evaluation and management of chronic kidney disease. In: National Guideline Clearinghouse (NGC) [Web site]. Rockville (MD): Agency for Healthcare Research and Quality (AHRQ); 2013 Jan 01. [cited 2017 Jun 29]. Available: <https://www.guideline.gov>.
- 16 Levey AS, Stevens LA, Schmid CH, *et al*. A new equation to estimate glomerular filtration rate. *Ann Intern Med* 2009;**150**:604–12.
- 17 Taher AT, Aoun J, Salameh P. The AVAIL ME study: a multinational survey of VTE risk and prophylaxis. *J Thromb Thrombolysis* 2011;**31**:47–56. doi:10.1007/s11239-010-0492-2
- 18 Cohen AT, Tapson VF, Bergmann J-F, *et al*. Venous thromboembolism risk and prophylaxis in the acute hospital care setting (ENDORSE study): a multinational cross-sectional study. *Lancet Lond Engl* 2008;**371**:387–94. doi:10.1016/S0140-6736(08)60202-0
- 19 Nieto JA, Cámara T, Camacho I, *et al*. Venous thromboembolism prophylaxis in acutely ill hospitalized medical patients. A retrospective multicenter study. *Eur J Intern Med* 2014;**25**:717–23. doi:10.1016/j.ejim.2014.07.005
- 20 Tapson VF, Decousus H, Pini M, *et al*. Venous thromboembolism prophylaxis in acutely ill hospitalized medical patients: findings from the International Medical Prevention Registry on Venous Thromboembolism. *Chest* 2007;**132**:936–45. doi:10.1378/chest.06-2993
- 21 Francis CW. Clinical practice. Prophylaxis for thromboembolism in hospitalized medical patients. *N Engl J Med* 2007;**356**:1438–44. doi:10.1056/NEJMc067264
- 22 Dentali F, Douketis JD, Gianni M, *et al*. Meta-analysis: anticoagulant prophylaxis to prevent symptomatic venous thromboembolism in hospitalized medical patients. *Ann Intern Med* 2007;**146**:278–88.
- 23 Triscott J, Mercer S, Tian PGJ, *et al*. Retroperitoneal haematoma associated with enoxaparin use in an elderly woman with chronic kidney disease. *BMJ Case Rep* 2015. doi:10.1136/bcr-2015-211699

- 1  
2  
3 24 Madridano O, Martín Del Pozo M, Masso P, *et al.* [Hematoma of the rectus  
4 abdominis muscle in patients treated with low-molecular-weight heparin: four  
5 clinical cases]. *Rev Clin Esp* 2011;**211**:109–10. doi:10.1016/j.rce.2010.09.007  
6  
7 25 Nourbakhsh E, Anvari R, Nugent K. Abdominal wall hematomas associated with  
8 low-molecular-weight heparins: an important complication in older adults. *J Am*  
9 *Geriatr Soc* 2011;**59**:1543–5. doi:10.1111/j.1532-5415.2011.03529.x  
10  
11 26 Macías-Robles MD, Peliz MG, Gonzalez-Ordóñez AJ. Prophylaxis with enoxaparin  
12 can produce a giant abdominal wall haematoma when associated with low doses of  
13 aspirin among elderly patients suffering cough attacks. *Blood Coagul Fibrinolysis*  
14 *Int J Haemost Thromb* 2005;**16**:217–9.  
15  
16 27 Goldstein JM, Sebire D. Abdominal wall haematoma in the obese: a dangerous  
17 phenomenon. *J Surg Case Rep* 2013;**2013**. doi:10.1093/jscr/rjt060  
18  
19 28 Blüher M. Adipose tissue dysfunction in obesity. *Exp Clin Endocrinol Diabetes Off*  
20 *J Ger Soc Endocrinol Ger Diabetes Assoc* 2009;**117**:241–50. doi:10.1055/s-0029-  
21 1192044  
22  
23 29 Baptista LS, da Silva KR, da Pedrosa CSG, *et al.* Adipose tissue of control and ex-  
24 obese patients exhibit differences in blood vessel content and resident mesenchymal  
25 stem cell population. *Obes Surg* 2009;**19**:1304–12. doi:10.1007/s11695-009-9899-2  
26  
27 30 Spencer M, Unal R, Zhu B, *et al.* Adipose tissue extracellular matrix and vascular  
28 abnormalities in obesity and insulin resistance. *J Clin Endocrinol Metab*  
29 2011;**96**:E1990–1998. doi:10.1210/jc.2011-1567  
30  
31  
32  
33  
34  
35  
36  
37  
38  
39  
40  
41  
42  
43  
44  
45  
46  
47  
48  
49  
50  
51  
52  
53  
54  
55  
56  
57  
58  
59  
60

Table 1. Global baseline characteristics and analysis of differences regarding the type of HBPM used for VTE prophylaxis.

| Variable               | Global (396) | Tinzaparin (120) | Enoxaparin (276) | P      |
|------------------------|--------------|------------------|------------------|--------|
| Male                   | 191 (48)     | 57 (47.5)        | 134 (48.5)       | 0.848  |
| CKD                    | 91 (23)      | 43 (36)          | 48 (17)          | <0.001 |
| Diabetes mellitus      | 112 (28)     | 38 (32)          | 74 (27)          | 0.324  |
| Neoplasia              | 37 (9)       | 11 (9)           | 26 (9)           | 0.928  |
| Obesity                | 113 (28.5)   | 30 (25)          | 83 (30)          | 0.342  |
| Previous VTE           | 4 (1)        | 3 (2.5)          | 1 (0.4)          | 0.085  |
| 30-day surgery         | 5 (1)        | 1 (1)            | 4 (1.5)          | 0.521  |
| Stroke                 | 49 (12)      | 13 (11)          | 36 (13)          | 0.539  |
| Autoimmune disease     | 17 (4)       | 2 (2)            | 15 (5.5)         | 0.089  |
| Liver disease          | 24 (6)       | 8 (7)            | 16 (5.5)         | 0.739  |
| Antiplatelet treatment | 182 (46)     | 53 (44)          | 129 (47)         | 0.271  |
| Infectious disease     | 316 (80)     | 92 (77)          | 224 (81)         | 0.306  |
| Anemia                 | 156 (39)     | 54 (45)          | 102 (37)         | 0.116  |
| AKI                    | 95 (24)      | 41 (34)          | 54 (19.5)        | 0.002  |
| CKD exacerbation       | 79 (20)      | 39 (32.5)        | 40 (14.5)        | <0.001 |
| Heart failure          | 137 (34.5)   | 50 (42)          | 87 (31.5)        | 0.051  |
| PADOVA > 4             | 342 (86)     | 112 (93)         | 230 (83)         | 0.001  |
| IMPROVE > 7            | 24 (6)       | 9 (7.5)          | 15 (5.5)         | 0.387  |
| BARTHEL < 20           | 56 (14)      | 21 (17.5)        | 35 (13)          | 0.218  |
| PFEIFFER > 5           | 154 (39)     | 51 (42.5)        | 103 (37)         | 0.257  |

CKD: Chronic Kidney Disease. VTE: Venous Thromboembolism. AKI: Acute Kidney Injury.

1  
2  
3  
4  
5  
6  
7  
8 **December 20<sup>th</sup> 2017**  
9

10  
11  
12 Dear Editor:

13  
14  
15  
16 Enclosed please find our paper entitled "Fulfilment of current VTE prophylaxis  
17 guidelines and risk factors linked to complications of VTE prophylaxis in medical  
18 patients". Considering that our work is the first one to analyse the main risk factors of  
19 VTE in medical elderly patients, we believe that our results are of great interest in this  
20 field of research. Thus we hope you could accept our work as a candidate for  
21 publication in your journal.  
22  
23  
24

25  
26 The submitted manuscript has been read and approved by all authors. Besides, all  
27 authors acknowledge that they have exercised due care in ensuring the integrity of the  
28 work. The study protocol was revised and approved by the Ethics Committee of the  
29 University Hospital of Santiago de Compostela and it conforms to the provision of the  
30 Declaration of Helsinki. All participants gave informed consent and anonymity was  
31 preserved in all the stages of the study. Finally, none of the original material contained  
32 in the manuscript has been submitted for consideration nor will any of it be published  
33 elsewhere except in abstract form in connection with scientific meetings.  
34  
35  
36  
37

38  
39 Sincerely,

40  
41   
42  
43

44 Ignacio Novo-Veleiro, M.D., Ph.D.

45 Staff Physician. Department of Internal Medicine, University Teaching Hospital of Santiago de  
46 Compostela.

47 C/ Choupana s/n, Santiago de Compostela, A Coruña, Galicia, Spain.

48 Telephone: 00-34-619287884. E-mail: ignacio.novo.veleiro@gmail.com  
49  
50  
51  
52  
53  
54  
55  
56  
57  
58  
59  
60

**STROBE 2007 (v4) Statement—Checklist of items that should be included in reports of *cohort studies***

| Section/Topic                | Item # | Recommendation                                                                                                                                                                       | Reported on page # |
|------------------------------|--------|--------------------------------------------------------------------------------------------------------------------------------------------------------------------------------------|--------------------|
| Title and abstract           | 1      | (a) Indicate the study's design with a commonly used term in the title or the abstract                                                                                               | 1                  |
|                              |        | (b) Provide in the abstract an informative and balanced summary of what was done and what was found                                                                                  | 2                  |
| <b>Introduction</b>          |        |                                                                                                                                                                                      |                    |
| Background/rationale         | 2      | Explain the scientific background and rationale for the investigation being reported                                                                                                 | 4                  |
| Objectives                   | 3      | State specific objectives, including any prespecified hypotheses                                                                                                                     | 4                  |
| <b>Methods</b>               |        |                                                                                                                                                                                      |                    |
| Study design                 | 4      | Present key elements of study design early in the paper                                                                                                                              | 5                  |
| Setting                      | 5      | Describe the setting, locations, and relevant dates, including periods of recruitment, exposure, follow-up, and data collection                                                      | 5-7                |
| Participants                 | 6      | (a) Give the eligibility criteria, and the sources and methods of selection of participants. Describe methods of follow-up                                                           | 5-7                |
|                              |        | (b) For matched studies, give matching criteria and number of exposed and unexposed                                                                                                  | -                  |
| Variables                    | 7      | Clearly define all outcomes, exposures, predictors, potential confounders, and effect modifiers. Give diagnostic criteria, if applicable                                             | 5-7                |
| Data sources/<br>measurement | 8*     | For each variable of interest, give sources of data and details of methods of assessment (measurement). Describe comparability of assessment methods if there is more than one group | 5-7                |
| Bias                         | 9      | Describe any efforts to address potential sources of bias                                                                                                                            | 5-7                |
| Study size                   | 10     | Explain how the study size was arrived at                                                                                                                                            | 5-7                |
| Quantitative variables       | 11     | Explain how quantitative variables were handled in the analyses. If applicable, describe which groupings were chosen and why                                                         | 5-7                |
| Statistical methods          | 12     | (a) Describe all statistical methods, including those used to control for confounding                                                                                                | 6-7                |
|                              |        | (b) Describe any methods used to examine subgroups and interactions                                                                                                                  | 6-7                |
|                              |        | (c) Explain how missing data were addressed                                                                                                                                          | 6-7                |
|                              |        | (d) If applicable, explain how loss to follow-up was addressed                                                                                                                       | -                  |
|                              |        | (e) Describe any sensitivity analyses                                                                                                                                                | -                  |
| <b>Results</b>               |        |                                                                                                                                                                                      |                    |

|                          |     |                                                                                                                                                                                                              |       |
|--------------------------|-----|--------------------------------------------------------------------------------------------------------------------------------------------------------------------------------------------------------------|-------|
| Participants             | 13* | (a) Report numbers of individuals at each stage of study—eg numbers potentially eligible, examined for eligibility, confirmed eligible, included in the study, completing follow-up, and analysed            | -     |
|                          |     | (b) Give reasons for non-participation at each stage                                                                                                                                                         | -     |
|                          |     | (c) Consider use of a flow diagram                                                                                                                                                                           | -     |
| Descriptive data         | 14* | (a) Give characteristics of study participants (eg demographic, clinical, social) and information on exposures and potential confounders                                                                     | 7-9   |
|                          |     | (b) Indicate number of participants with missing data for each variable of interest                                                                                                                          | 7-9   |
|                          |     | (c) Summarise follow-up time (eg, average and total amount)                                                                                                                                                  | -     |
| Outcome data             | 15* | Report numbers of outcome events or summary measures over time                                                                                                                                               | 7-9   |
| Main results             | 16  | (a) Give unadjusted estimates and, if applicable, confounder-adjusted estimates and their precision (eg, 95% confidence interval). Make clear which confounders were adjusted for and why they were included | 7-9   |
|                          |     | (b) Report category boundaries when continuous variables were categorized                                                                                                                                    | 7-9   |
|                          |     | (c) If relevant, consider translating estimates of relative risk into absolute risk for a meaningful time period                                                                                             | -     |
| Other analyses           | 17  | Report other analyses done—eg analyses of subgroups and interactions, and sensitivity analyses                                                                                                               | 7-9   |
| <b>Discussion</b>        |     |                                                                                                                                                                                                              |       |
| Key results              | 18  | Summarise key results with reference to study objectives                                                                                                                                                     | 10-11 |
| <b>Limitations</b>       |     |                                                                                                                                                                                                              |       |
| Interpretation           | 20  | Give a cautious overall interpretation of results considering objectives, limitations, multiplicity of analyses, results from similar studies, and other relevant evidence                                   | 11-12 |
| Generalisability         | 21  | Discuss the generalisability (external validity) of the study results                                                                                                                                        | 10-12 |
| <b>Other information</b> |     |                                                                                                                                                                                                              |       |
| Funding                  | 22  | Give the source of funding and the role of the funders for the present study and, if applicable, for the original study on which the present article is based                                                | -     |

\*Give information separately for cases and controls in case-control studies and, if applicable, for exposed and unexposed groups in cohort and cross-sectional studies.

**Note:** An Explanation and Elaboration article discusses each checklist item and gives methodological background and published examples of transparent reporting. The STROBE checklist is best used in conjunction with this article (freely available on the Web sites of PLoS Medicine at <http://www.plosmedicine.org/>, Annals of Internal Medicine at <http://www.annals.org/>, and Epidemiology at <http://www.epidem.com/>). Information on the STROBE Initiative is available at [www.strobe-statement.org](http://www.strobe-statement.org).

# BMJ Open

## Compliance with current VTE prophylaxis guidelines and risk factors linked to complications of VTE prophylaxis in medical patients: a prospective study in an Internal Medicine Department.

|                                 |                                                                                                                                                                                                                                                                                                                                                                                                                                                                                                                                                                                        |
|---------------------------------|----------------------------------------------------------------------------------------------------------------------------------------------------------------------------------------------------------------------------------------------------------------------------------------------------------------------------------------------------------------------------------------------------------------------------------------------------------------------------------------------------------------------------------------------------------------------------------------|
| Journal:                        | <i>BMJ Open</i>                                                                                                                                                                                                                                                                                                                                                                                                                                                                                                                                                                        |
| Manuscript ID                   | bmjopen-2017-021288.R1                                                                                                                                                                                                                                                                                                                                                                                                                                                                                                                                                                 |
| Article Type:                   | Research                                                                                                                                                                                                                                                                                                                                                                                                                                                                                                                                                                               |
| Date Submitted by the Author:   | 26-Feb-2018                                                                                                                                                                                                                                                                                                                                                                                                                                                                                                                                                                            |
| Complete List of Authors:       | Novo-Veleiro, Ignacio; Complejo Hospitalario Universitario de Santiago de Compostela, Internal Medicine<br>Alvela-Suárez, Lucía; Hospital HM Rosaleda, Internal Medicine<br>Costa-Grille, Alba; Complejo Hospitalario Universitario de Santiago de Compostela, Internal Medicine<br>Suárez-Dono, Javier; Complejo Hospitalario Universitario de Santiago de Compostela, Internal Medicine<br>Ferrón-Vidan, Fernando; Complejo Hospitalario Universitario de Santiago de Compostela, Internal Medicine<br>Reino, Antonio; Complejo Hospitalario Universitario de Santiago de Compostela |
| <b>Primary Subject Heading</b>: | Haematology (incl blood transfusion)                                                                                                                                                                                                                                                                                                                                                                                                                                                                                                                                                   |
| Secondary Subject Heading:      | Geriatric medicine, Medical management, Patient-centred medicine                                                                                                                                                                                                                                                                                                                                                                                                                                                                                                                       |
| Keywords:                       | Thromboembolism < CARDIOLOGY, GERIATRIC MEDICINE, Bleeding disorders & coagulopathies < HAEMATOLOGY                                                                                                                                                                                                                                                                                                                                                                                                                                                                                    |
|                                 |                                                                                                                                                                                                                                                                                                                                                                                                                                                                                                                                                                                        |

SCHOLARONE™  
Manuscripts

1  
2  
3 **Title:** Compliance with current VTE prophylaxis guidelines and risk factors linked to  
4 complications of VTE prophylaxis in medical patients: a prospective study in an  
5 Internal Medicine Department.  
6  
7  
8  
9

10  
11 **Authors:** Ignacio Novo-Veleiro<sup>1\*</sup>, Lucía Alvela-Suárez<sup>2</sup>, Alba Costa-Grille<sup>3</sup>, Javier  
12 Suárez-Dono<sup>1</sup>, Fernando Ferrón-Vidán<sup>1</sup>, Antonio Pose-Reino<sup>1</sup>.  
13  
14  
15

16  
17  
18 **Filiations:**

19  
20 <sup>1</sup> Internal Medicine Department. University Hospital of Santiago de Compostela. A  
21 Coruña. Spain.  
22  
23

24 <sup>2</sup> Internal Medicine Department. HM Rosaleda Hospital. Santiago de Compostela. A  
25 Coruña. Spain.  
26  
27

28 <sup>3</sup> Geriatrics Department. University Hospital of Getafe. Madrid. Spain.  
29  
30  
31  
32  
33  
34  
35  
36  
37  
38  
39  
40  
41  
42  
43

44 **\*Corresponding author:** Ignacio Novo-Veleiro. Internal Medicine Department.  
45 University Hospital of Santiago de Compostela. A Coruña. Spain. 15701. Tel. +34  
46 981951725. Email: ignacio.novo.veleiro@gmail.com.  
47  
48  
49  
50  
51  
52  
53  
54  
55  
56  
57  
58  
59  
60



1  
2  
3 ABSTRACT:  
4

5 *Objectives:* the main objectives were to evaluate the degree of compliance with  
6 current guidelines regarding venous thromboembolism (VTE) prophylaxis in medical  
7 patients during admission and to identify risk factors linked to complications of this  
8 prophylaxis.  
9

10  
11  
12  
13  
14 *Design:* a prospective cohort study was conducted.  
15

16  
17 *Setting:* Internal Medicine Department of the University Hospital of Santiago de  
18 Compostela (tertiary referral hospital).  
19

20  
21  
22 *Participants:* 396 hospitalized, non-surgical elderly patients with no active or  
23 previous oral anticoagulation or low molecular weight heparin (LMWH) treatment  
24 (during the previous year) and who received VTE prophylaxis during admission.  
25  
26

27  
28  
29 *Primary and secondary outcome measures:* the degree of compliance with the  
30 current guidelines was estimated by calculating PADOVA and IMPROVE indexes in  
31 all cases. We analysed the development of the following complications: major and  
32 minor bleeding, major and minor hematoma and decrease of platelet count.  
33  
34  
35

36  
37  
38 *Results:* we found that VTE prophylaxis was correctly indicated in 88.4% of  
39 patients. We found 2 (0.5%) major bleeding, 17 (4.3%) minor bleeding, 30 (7.6%)  
40 platelet count decrease, 29 (7.3%) major hematoma and 82 (20.7%) minor hematoma.  
41  
42 After a multivariate logistic regression analysis, the presence of major hematomas was  
43 linked to obesity (OR=4.1; IC 95% 1.8–9.2;  $P = 0.001$ ), concomitant antiplatelet  
44 treatment (OR=2.7; IC 95% 1.1–6.5;  $P = 0.03$ ) and enoxaparin use (OR=3.5; IC 95%  
45 1.1–10.9;  $P = 0.029$ ) and the presence of minor hematomas was associated with  
46 PADOVA index < 4 points (OR=3.1; IC 95% 1.5–6.4;  $P = 0.003$ ) and Diabetes Mellitus  
47 (OR=2; IC 95% 1.1–3.7;  $P = 0.031$ ).  
48  
49  
50  
51  
52  
53  
54  
55  
56  
57  
58  
59  
60

1  
2  
3           *Conclusions:* complications during VTE prophylaxis in elderly hospitalized  
4 medical patients are frequent despite a correct application of current guidelines. The  
5 main factors linked to hematomas were obesity and concomitant antiplatelet treatment  
6 and their presence should lead physicians to exercise extreme caution. The use of  
7 tinzaparin for VTE prophylaxis in these patients could have a better safety profile.  
8  
9  
10  
11  
12

#### 13 14 15 16           STRENGTHS AND LIMITATIONS OF THIS STUDY:

##### 17 18           *Strengths:*

- 19           - Clinical study in elderly patients, who are usually excluded from large studies.
- 20
- 21           - Analysis of compliance with current guidelines in VTE prophylaxis in real-life  
22 conditions.  
23
- 24           - Detection of minor complications and risk factors that have usually been  
25 underestimated in previous studies.  
26

##### 27 28           *Limitations:*

- 29           - Observational study conducted in only one department of a single hospital,  
30 which did not allow for a correct homogenization of subgroups.  
31
- 32           - The inclusion of patients with VTE prophylaxis only could be a selection bias.  
33

34  
35  
36           FUNDING STATEMENT: this research received no specific grant from any  
37 funding agency in the public, commercial or not-for-profit sectors.  
38  
39  
40

41  
42           COMPETING INTERESTS STATEMENT: all authors declare that they have  
43 no competing interests.  
44  
45  
46

## INTRODUCTION:

Low molecular weight heparin (LMWH) use is extended in hospitalized patients, since most of them meet high-risk criteria for venous and pulmonary embolism [1]. These criteria have been re-defined by the American College of Chest Physicians and place an emphasis on calculating the risk of venous thromboembolism (VTE) development and the bleeding risk before starting VTE prophylaxis on both surgical and non-surgical inpatients [2,3]. In these sense, it is worth noting that the factors linked to a higher bleeding risk have been intensely analysed in patients who underwent surgical procedures; but there is lack of data in the case of non-surgical patients [4]. Moreover, the occurrence of some non-life-threatening secondary effects, like abdominal hematomas, has been poorly studied during VTE prophylaxis in non-surgical patients [5].

The alignment of real daily clinical practice with the current recommendations is another interesting point to which attention must be paid. Previous studies showed an acceptable match between guidelines and clinical practice in surgical patients but, again, only a few observational studies in non-surgical patients analyse this fact [1,6–8].

The aim of the present study was, therefore, on the one hand, to analyse compliance with current VTE prophylaxis guidelines in non-surgical patients in an Internal Medicine Department and, on the other hand, to describe the incidence of major and minor secondary effects with LMWH prophylaxis and to detect potential risk factors linked to them.

PATIENTS AND METHODS:

The inclusion criteria were: hospitalized non-surgical patients with no active or previous oral anticoagulation or LMWH treatment (during the previous year). There was no restriction regarding the cause of hospital admission. In all cases physicians indicated VTE prophylaxis with no intervention from the study staff. Written informed consent was obtained from all patients and data collection was performed through a personal interview by trained staff and a review of their electronic medical history.

Age-adjusted Charlson's index (ACI) was used to assess the comorbidity degree of the patients included [9]. We also applied the Barthel's index (BI) to calculate functional status [10], the CONUT Score (CS) to detect and establish nutritional deficiencies [11] and the Pfeiffer's test (PT) to conduct a mental status evaluation of all the patients included [12].

In light of current recommendations, the PADOVA index was calculated in all cases to check the adequacy of the clinical practice to guidelines [4]. VTE prophylaxis was considered as indicated with at least 4 points in PADOVA index [13]. On the other hand, the IMPROVE index was used to calculate bleeding risk, considering as high-risk patients those with at least 7 points [14].

Chronic Kidney Disease (CKD) was assessed in patients with decreased glomerular filtration rate (GFR) (<60 mL/min) for at least 3 months before admission, following current guidelines [15]. Acute Kidney Injury (AKI) was considered in patients with GFR < 60 mL/min at admission without previous diagnosis of CKD. Patients with previous CKD and worsening of GFR at admission were coded as CKD exacerbation (CKDE). GFR was calculated using 2009 CKD-Epidemiology Collaboration (EPI) creatinine equation in all cases [16].

1  
2  
3 As to obesity, it was considered in all patients with a Body Mass Index (BMI)  
4 over 30 kg/m<sup>2</sup>. For the main alterations in blood count we applied World Health  
5 Association (WHO) criteria for anemia and we coded as thrombocytopenia at admission  
6 all patients with values under 120000/ $\mu$ L. As to coagulation tests alterations, we  
7 considered them in all cases with an International Normalized Ratio (INR) over 1.2 or  
8 Activated Partial Thromboplastin Time (APTT) over 35 seconds.  
9  
10  
11  
12  
13  
14  
15

16 The heparin types available in our center for the duration of the study were only  
17 enoxaparin and tinzaparin. They are therefore the only heparins included in our  
18 analysis.  
19  
20  
21  
22

23 With regard to the analysed complications, we defined them as follows:

24  
25 -Major bleeding: gastrointestinal or intracranial bleeding, haemoptysis, epistaxis  
26 or haematuria with a decrease of at least 2 g/dL in haemoglobin level.  
27  
28  
29

30 -Minor bleeding: haemoptysis, epistaxis or haematuria without analytical impact  
31 or with a decrease of less than 2 g/dL.  
32  
33  
34

35 -Platelet count decrease: loss of at least 50% compared to the baseline value.  
36  
37

38 -Major hematoma: retroperitoneal or straight abdominal muscles locations were  
39 considered as major hematoma in all cases. We also considered as major hematoma an  
40 abdominal hematoma in other locations which implied a loss of at least 2 points in  
41 hemoglobin levels.  
42  
43  
44  
45

46 -Minor hematoma: abdominal wall hematoma (any location) with an extension  
47 of more than 5 cm without hemoglobin loss or with a hemoglobin loss lower than 2  
48 points. We also considered as minor hematoma all abdominal wall hematomas of any  
49 extension, which caused symptoms like pain or pruritus requiring specific treatment.  
50  
51  
52  
53  
54  
55  
56  
57  
58  
59  
60

1  
2  
3 -Pulmonary embolism (PE): we coded all cases diagnosed during hospital stay  
4 which were undiagnosed and unsuspected at admission.  
5

6  
7 -Deep venous thrombosis (DVT): we considered all cases diagnosed during  
8 hospital stay which were undiagnosed and unsuspected at admission.  
9

10  
11 A descriptive analysis was performed by calculating qualitative-variable rates  
12 plus mean and standard deviation. We used the Chi-square test or Fisher's exact test, as  
13 appropriate (expected frequency value <5), to compare qualitative variables, and the  
14 Student's t test for quantitative variables. A multivariate logistic regression analysis was  
15 conducted to identify factors associated with complications. A *P*-value <0.05 was  
16 regarded as significant. All analyses were performed using the SPSS v. 22.0 software  
17 package (SPSS Inc., Chicago, IL, USA).  
18  
19  
20  
21  
22  
23  
24  
25  
26

27 The protocol of the present study was reviewed and approved by the Clinical  
28 Investigations Ethical Committee of Galicia.  
29  
30  
31  
32  
33  
34

### 35 *Patient and Public Involvement*

36  
37 There were no patient or public involvement in the development of the study  
38 design, protocol, recruitment or dissemination of results.  
39  
40  
41  
42  
43  
44

### 45 RESULTS:

46  
47 We included 396 consecutive inpatients that were given VTE prophylaxis during  
48 their hospital stay. Of them, 51.8% were women and the mean age was 80.7 years  
49 (Standard Deviation [SD] = 11.5, Range = 22 - 107). Only 32 patients (8.1%) lived in  
50 nursing homes and the average scores of the different classification tools applied at  
51  
52  
53  
54  
55  
56  
57  
58  
59  
60

admission were: ACI 5.5 (SD = 2.2) points, BI 55.5 (SD = 35.5) points, PT 3.3 (SD = 3) mistakes and CS 6.2 (SD = 2.6) points. CKD was present in 91 (23.2%) patients and Diabetes Mellitus in 111 (28.3%) of them, as well as obesity (111 patients). Other remarkable comorbidities were active cancer (37 patients, 9.5%) and haematological diseases (9 patients, 2.5%) The complete baseline characteristics and frequencies of the main thrombosis risk factors are detailed in Table 1.

Table 1. Global baseline characteristics and analysis of differences regarding the type of HBPM used for VTE prophylaxis.

| Variable               | Global (396) | Tinzaparin (120) | Enoxaparin (276) | P      |
|------------------------|--------------|------------------|------------------|--------|
| Male                   | 191 (48)     | 57 (47.5)        | 134 (48.5)       | 0.848  |
| Age                    | 80.7 (11.6)  | 83 (9.6)         | 79.8 (12.2)      | 0.083  |
| CKD                    | 91 (23)      | 43 (36)          | 48 (17)          | <0.001 |
| Diabetes mellitus      | 112 (28)     | 38 (32)          | 74 (27)          | 0.324  |
| Neoplasia              | 37 (9)       | 11 (9)           | 26 (9)           | 0.928  |
| Obesity                | 113 (28.5)   | 30 (25)          | 83 (30)          | 0.342  |
| Previous VTE           | 4 (1)        | 3 (2.5)          | 1 (0.4)          | 0.085  |
| 30-day surgery         | 5 (1)        | 1 (1)            | 4 (1.5)          | 0.521  |
| Stroke                 | 49 (12)      | 13 (11)          | 36 (13)          | 0.539  |
| Autoimmune disease     | 17 (4)       | 2 (2)            | 15 (5.5)         | 0.089  |
| Liver disease          | 24 (6)       | 8 (7)            | 16 (5.5)         | 0.739  |
| Antiplatelet treatment | 182 (46)     | 53 (44)          | 129 (47)         | 0.271  |
| Infectious disease     | 316 (80)     | 92 (77)          | 224 (81)         | 0.306  |
| Anemia                 | 156 (39)     | 54 (45)          | 102 (37)         | 0.116  |
| AKI                    | 95 (24)      | 41 (34)          | 54 (19.5)        | 0.002  |
| CKD exacerbation       | 79 (20)      | 39 (32.5)        | 40 (14.5)        | <0.001 |
| Heart failure          | 137 (34.5)   | 50 (42)          | 87 (31.5)        | 0.051  |
| PADOVA > 4             | 342 (86)     | 112 (93)         | 230 (83)         | 0.001  |
| IMPROVE > 7            | 24 (6)       | 9 (7.5)          | 15 (5.5)         | 0.387  |
| BARTHEL < 20           | 56 (14)      | 21 (17.5)        | 35 (13)          | 0.218  |
| PFEIFFER > 5           | 154 (39)     | 51 (42.5)        | 103 (37)         | 0.257  |

Data are showed as n (%) or mean (SD). CKD: Chronic Kidney Disease. VTE: Venous Thromboembolism. AKI: Acute Kidney Injury.

After the application of the PADOVA index, we found that VTE prophylaxis was correctly indicated in 88.4% of patients following these criteria, which means a prescription of VTE prophylaxis in 46 low-risk patients. In the case of the IMPROVE index, we found that 6.3% of patients had a high theoretical bleeding risk, which should

1  
2  
3 advise against VTE prophylaxis prescription. 22 patients (5.7%) fulfilled both  
4 PADOVA and IMPROVE criteria, which means concomitant high VTE and bleeding  
5 risk. We only found 2 patients (0.5%) with less than 4 points in the PADOVA index and  
6 high bleeding risk in the IMPROVE index.  
7  
8  
9

10  
11  
12 Regarding their general condition at admission, 316 (79.8%) patients presented  
13 with an infection, 155 (39.1%) had anaemia, 137 (34.6%) had an acute heart failure, 95  
14 (24%) met AKI criteria and 79 (19.9) met CKDE criteria. As to platelet count and  
15 coagulation tests, 93 (23.5%) patients had an alteration on coagulation tests at  
16 admission and 27 (6.8%) thrombocytopenia.  
17  
18  
19  
20  
21

22  
23 Considering the VTE prophylaxis, the most used LMWH was enoxaparin  
24 (69.7% of cases) followed by tinzaparin (30.3%) and the mean duration was 12 (SD =  
25 11.8) days. The most commonly used treatment regimens were 4000 International Units  
26 (IU) daily for enoxaparin (219 patients) and 3500 IU daily for tinzaparin (103 patients).  
27 The dose adjustment in patients with CKD, CKDE or AKI was correct in all cases. We  
28 did not register any episode of VTE during the study period.  
29  
30  
31  
32  
33  
34  
35

36  
37 With regard to complications, we found 2 patients (0.5%) who presented with  
38 major bleeding, 17 (4.3%) with a minor bleeding episode, 30 (7.6%) developed a  
39 platelet count decrease, 29 (7.3%) had a major hematoma (9 located in straight  
40 abdominal muscles and 20 in other abdominal locations) and 82 (20.7%) a minor  
41 hematoma. All patients who developed complications were managed through  
42 conservative treatment and the course was favourable in all cases. After the univariate  
43 analysis, we found an association between minor bleeding and the presence of anaemia  
44 at admission and AKI. In the case of major hematomas, this analysis showed significant  
45 differences in patients with obesity, concomitant antiplatelet treatment, an infection or  
46 heart failure as main cause of admission and the use of enoxaparin. With regard to  
47  
48  
49  
50  
51  
52  
53  
54  
55  
56  
57  
58  
59  
60



1  
2  
3 minor hematomas, we found an association with diabetes and a PADOVA index lower  
4 than 4 points. Finally, a platelet count decrease was only linked to an infection as the  
5 cause of admission and it was not associated with the other analysed complications.  
6  
7

8  
9  
10 After performing a multivariable analysis none of the variables showed an  
11 association with minor bleeding or platelet count decrease. The presence of major  
12 hematomas was linked to obesity (OR = 4.1; IC 95% 1.8 – 9.2;  $P = 0.001$ ), concomitant  
13 antiplatelet treatment (OR = 2.7; IC 95% 1.1 – 6.5;  $P = 0.03$ ) and enoxaparin use (OR =  
14 3.5; IC 95% 1.1 – 10.9;  $P = 0.029$ ) and the presence of minor hematomas was  
15 associated with the absence of indication of VTE prophylaxis following  
16 recommendations (PADOVA index < 4 points) (OR = 3.1; IC 95% 1.5 – 6.4;  $P = 0.003$ )  
17 and the presence of Diabetes Mellitus (OR = 2; IC 95% 1.1 – 3.7;  $P = 0.031$ ).  
18  
19  
20  
21  
22  
23  
24  
25  
26

27 In view of these results, we performed a sub-analysis to compare the clinical  
28 profile of patients who received enoxaparin and tinzaparin, which showed significant  
29 differences regarding renal function only, as shown in Table 1.  
30  
31  
32  
33  
34  
35  
36

### 37 DISCUSSION:

38  
39 The present study shows, for the first time to our knowledge, an exhaustive  
40 analysis of clinically relevant complications during VTE prophylaxis in non-surgical  
41 patients and the main risk factors linked to them.  
42  
43  
44  
45

46 As to the adaptation of the clinical practice to current guidelines, the high degree  
47 of adaptation observed is remarkable. There is, however, a narrow margin for  
48 improvement, particularly in the case of over-prescription in low-risk patients. Our  
49 study included only patients with VTE prophylaxis during hospital stay, which makes  
50 the comparison with studies like ENDORSE or AVAIL ME difficult as they showed  
51  
52  
53  
54  
55  
56  
57  
58  
59  
60

1  
2  
3 lower percentages of correct application of recommendations, even as low as below  
4  
5 50% [17,18].  
6

7  
8 Another relevant difference of our study is that it is exclusively confined to  
9  
10 medical patients as well as the extremely high age and degree of comorbidity of our  
11  
12 cohort, compared with larger series where patients with a mean age more than 10 years  
13  
14 lower and very low rates of multiple comorbidity [19,20] were included.  
15

16  
17 The absence of VTE cases in our study reflects a high efficacy of VTE  
18  
19 prophylaxis in medical patients, which has been largely studied and supported by high-  
20  
21 quality evidence [21,22].  
22

23  
24 With respect to complications, we analyzed minor complications, like  
25  
26 hematomas, that are usually undervalued by physicians, but for patients are important.  
27  
28 Indeed, we consider that our results could help physicians to improve their daily clinical  
29  
30 practice and the patient's experience during a hospital admission.  
31

32  
33 As far as bleeding episodes are concerned, they were infrequent. But the  
34  
35 association between anemia and minor bleeding could reflect the existence of previous  
36  
37 digestive bleeding, increased during admission by LMWH, and the association with  
38  
39 AKI could be explained by a heparin over-effect in these patients, although we did not  
40  
41 detect significant rates of unadjusted dosage in our cohort. In fact, an increased bleeding  
42  
43 risk was one of the main risk factors considered on the IMPROVE score, although  
44  
45 anemia was not a useful marker of bleeding risk in that study [14]. Thus, our results  
46  
47 could contribute to expand the tools available to identify patients with high bleeding  
48  
49 risk before prescribing VTE prophylaxis.  
50

51  
52  
53 In the case of major hematomas, we must underscore the relatively high  
54  
55 percentage of patients who developed these complications. Despite the clinical  
56  
57  
58  
59

1  
2  
3 relevance of abdominal and retroperitoneal hematomas, large series did not analyze  
4 these complications and we can only compare our results with small series and case  
5 reports [14,18,23,24]. In this sense, previous reports suggested an estimated incidence  
6 of 5% for abdominal hematomas in patients receiving VTE prophylaxis, which could be  
7 comparable to ours [25]. With regard to risk factors, previous studies showed that  
8 elderly patients had a higher risk of abdominal hematomas [23,25,26]; we did not  
9 identify this association, probably because of the little number of patients aged below  
10 65 years. Concomitant antiplatelet treatment has been identified as a risk factor linked  
11 to hematomas by other authors, due to the synergic action with LMWH, and our  
12 findings reinforce the importance of assessing the need to maintain these drugs during  
13 hospital admission in elderly patients [23,25,26]. Obesity has also been described as a  
14 risk factor in previous studies [25,27], and this relationship could be due to an adipose  
15 tissue dysfunction in obese patients linked to an abnormal subcutaneous vascularization  
16 and extracellular matrix changes [28–30]. These alterations lead to a higher risk of local  
17 hematomas in obese patients under VTE prophylaxis, independently of the plasmatic  
18 levels of LMWH achieved [26].

19  
20  
21  
22  
23  
24  
25  
26  
27  
28  
29  
30  
31  
32  
33  
34  
35  
36  
37  
38 As to the different LMWH used in our study, we found a lower risk of major  
39 hematomas with tinzaparin as the only significant difference. Interestingly, the  
40 characteristics of patients treated with both of them were different regarding renal  
41 function, so the use of tinzaparin in patients with poorer renal function could have  
42 alerted physicians to the need of better dose adjustment. Thus, it could be considered as  
43 a potential selection bias, which should be taken into account during the interpretation  
44 of our results. Despite this, a potential superior safety profile in elderly patients with  
45 high comorbidity emerges and even differences in device, needles and mode of  
46  
47  
48  
49  
50  
51  
52  
53  
54  
55  
56  
57  
58  
59  
60

1  
2  
3 administration should be considered. Further studies will be necessary to properly  
4  
5 establish this difference.  
6

7  
8 As to minor hematomas, it is remarkable that this complication is not usually  
9  
10 considered as clinically relevant. However, we decided to include it as we considered  
11  
12 that it is completely relevant for our patients. In this sense, the association with a  
13  
14 PADOVA index lower than 4 points cannot be considered as a risk factor itself, but it  
15  
16 helps us to highlight the importance of a correct application of VTE prophylaxis  
17  
18 guidelines. In the case of Diabetes Mellitus, it has not been previously described as a  
19  
20 risk factor for abdominal hematomas development but microvascular diabetic  
21  
22 complications might underlie this association [25].  
23

24  
25 Despite the high percentage of patients with alterations in coagulation tests  
26  
27 (23.5%), we found no association between these alterations and the related  
28  
29 complications. This could be due to the little relevance of most of alterations in  
30  
31 coagulation tests, consisting of small increments of INR or APTT.  
32  
33

### 34 35 36 37 CONCLUSIONS:

38  
39  
40 The development of complications during VTE prophylaxis in elderly  
41  
42 hospitalized medical patients is higher than that expected in other populations even  
43  
44 when the current guidelines are correctly applied. The main factors linked to hematomas  
45  
46 in our cohort were obesity and concomitant antiplatelet treatment and their presence  
47  
48 should lead physicians to exercise extreme caution. The use of tinzaparin for VTE  
49  
50 prophylaxis in these patients could have a better safety profile.  
51  
52

### 53 54 55 56 AUTHOR'S CONTRIBUTIONS:

1  
2  
3 -Study concept and design: Drs. Antonio Pose-Reino, Ignacio Novo-Veleiro  
4 and Lucía Alvela-Suárez.  
5

6  
7 -Acquisition of subjects and/or data: Drs. Ignacio Novo-Veleiro, Lucía  
8 Alvela-Suárez and Alba Costa-Grille.  
9

10  
11 -Analysis and interpretation of data: Drs. Ignacio Novo-Veleiro, Javier  
12 Suárez-Dono, Fernando Ferrón-Vidán and Antonio Pose-Reino.  
13

14  
15 -Preparation of manuscript: Drs. Ignacio Novo-Veleiro, Lucía Alvela-Suárez  
16 and Antonio Pose-Reino.  
17

18  
19  
20  
21  
22  
23 DATA SHARING STATEMENT: Technical appendix, statistical code, and  
24 dataset will be available from the Dryad repository if required.  
25

26  
27  
28  
29  
30 FUNDING STATEMENT: this research received no specific grant from any  
31 funding agency in the public, commercial or not-for-profit sectors.  
32

33  
34  
35  
36  
37  
38 COMPETING INTERESTS STATEMENT: all authors declare that they have  
39 no competing interests.  
40

## REFERENCES

- 1 Nieto Rodríguez JA, ENDORSE. [Venous thromboembolism risk and antithrombotic prophylaxis among patients admitted to Spanish hospitals (ENDORSE study)]. *Med Clin (Barc)* 2009;**133**:1–7. doi:10.1016/j.medcli.2009.01.040
- 2 Gould MK, Garcia DA, Wren SM, *et al.* Prevention of VTE in nonorthopedic surgical patients: Antithrombotic Therapy and Prevention of Thrombosis, 9th ed: American College of Chest Physicians Evidence-Based Clinical Practice Guidelines. *Chest* 2012;**141**:e227S–e277S. doi:10.1378/chest.11-2297
- 3 Falck-Ytter Y, Francis CW, Johanson NA, *et al.* Prevention of VTE in orthopedic surgery patients: Antithrombotic Therapy and Prevention of Thrombosis, 9th ed: American College of Chest Physicians Evidence-Based Clinical Practice Guidelines. *Chest* 2012;**141**:e278S–e325S. doi:10.1378/chest.11-2404
- 4 Kahn SR, Lim W, Dunn AS, *et al.* Prevention of VTE in nonsurgical patients: Antithrombotic Therapy and Prevention of Thrombosis, 9th ed: American College of Chest Physicians Evidence-Based Clinical Practice Guidelines. *Chest* 2012;**141**:e195S–e226S. doi:10.1378/chest.11-2296
- 5 Decousus H, Tapson VF, Bergmann J-F, *et al.* Factors at admission associated with bleeding risk in medical patients: findings from the IMPROVE investigators. *Chest* 2011;**139**:69–79. doi:10.1378/chest.09-3081
- 6 Ruiz-Artacho P, Pérez Peña C, Iriarte A, *et al.* [Adequation of thromboprophylaxis during former admission in patients attended in emergencies with thromboembolic disease]. *Med Clin (Barc)* 2013;**141**:130–1. doi:10.1016/j.medcli.2012.12.014
- 7 Gallardo Jiménez P, Guijarro Merino R, Vallejo Herrera V, *et al.* [Assessment of venous thromboembolism risk in hospitalized medical patients. Concordance between PRETEMED guide and the recommendations of the viii conference of the American College of Chest Physicians]. *Med Clin (Barc)* 2012;**139**:467–72. doi:10.1016/j.medcli.2011.07.022
- 8 Borobia AM, Fernández Capitán C, Iñesta Arandia N, *et al.* [Risk of thromboembolic events and evaluation of the use of venous thromboembolism prophylaxis in hospitalized medical patients and after discharge]. *Rev Clin Esp* 2009;**209**:15–20.
- 9 Charlson ME, Pompei P, Ales KL, *et al.* A new method of classifying prognostic comorbidity in longitudinal studies: development and validation. *J Chronic Dis* 1987;**40**:373–83.
- 10 Mahoney FI, Barthel DW. FUNCTIONAL EVALUATION: THE BARTHEL INDEX. *Md State Med J* 1965;**14**:61–5.
- 11 Ignacio de Ulíbarri J, González-Madroño A, de Villar NGP, *et al.* CONUT: a tool for controlling nutritional status. First validation in a hospital population. *Nutr Hosp* 2005;**20**:38–45.

- 12 Pfeiffer E. A short portable mental status questionnaire for the assessment of organic brain deficit in elderly patients. *J Am Geriatr Soc* 1975;**23**:433–41.
- 13 Barbar S, Noventa F, Rossetto V, *et al.* A risk assessment model for the identification of hospitalized medical patients at risk for venous thromboembolism: the Padua Prediction Score. *J Thromb Haemost JTH* 2010;**8**:2450–7. doi:10.1111/j.1538-7836.2010.04044.x
- 14 Hostler DC, Marx ES, Moores LK, *et al.* Validation of the International Medical Prevention Registry on Venous Thromboembolism Bleeding Risk Score. *Chest* 2016;**149**:372–9. doi:10.1378/chest.14-2842
- 15 National Guideline Clearinghouse (NGC). Guideline summary: KDIGO 2012 clinical practice guideline for the evaluation and management of chronic kidney disease. In: National Guideline Clearinghouse (NGC) [Web site]. Rockville (MD): Agency for Healthcare Research and Quality (AHRQ); 2013 Jan 01. [cited 2017 Jun 29]. Available: <https://www.guideline.gov>.
- 16 Levey AS, Stevens LA, Schmid CH, *et al.* A new equation to estimate glomerular filtration rate. *Ann Intern Med* 2009;**150**:604–12.
- 17 Taher AT, Aoun J, Salameh P. The AVAIL ME study: a multinational survey of VTE risk and prophylaxis. *J Thromb Thrombolysis* 2011;**31**:47–56. doi:10.1007/s11239-010-0492-2
- 18 Cohen AT, Tapson VF, Bergmann J-F, *et al.* Venous thromboembolism risk and prophylaxis in the acute hospital care setting (ENDORSE study): a multinational cross-sectional study. *Lancet Lond Engl* 2008;**371**:387–94. doi:10.1016/S0140-6736(08)60202-0
- 19 Nieto JA, Cámara T, Camacho I, *et al.* Venous thromboembolism prophylaxis in acutely ill hospitalized medical patients. A retrospective multicenter study. *Eur J Intern Med* 2014;**25**:717–23. doi:10.1016/j.ejim.2014.07.005
- 20 Tapson VF, Decousus H, Pini M, *et al.* Venous thromboembolism prophylaxis in acutely ill hospitalized medical patients: findings from the International Medical Prevention Registry on Venous Thromboembolism. *Chest* 2007;**132**:936–45. doi:10.1378/chest.06-2993
- 21 Francis CW. Clinical practice. Prophylaxis for thromboembolism in hospitalized medical patients. *N Engl J Med* 2007;**356**:1438–44. doi:10.1056/NEJMcp067264
- 22 Dentali F, Douketis JD, Gianni M, *et al.* Meta-analysis: anticoagulant prophylaxis to prevent symptomatic venous thromboembolism in hospitalized medical patients. *Ann Intern Med* 2007;**146**:278–88.
- 23 Triscott J, Mercer S, Tian PGJ, *et al.* Retroperitoneal haematoma associated with enoxaparin use in an elderly woman with chronic kidney disease. *BMJ Case Rep* 2015;**2015**. doi:10.1136/bcr-2015-211699

- 1  
2  
3 24 Madridano O, Martín Del Pozo M, Masso P, *et al.* [Hematoma of the rectus  
4 abdominis muscle in patients treated with low-molecular-weight heparin: four  
5 clinical cases]. *Rev Clin Esp* 2011;**211**:109–10. doi:10.1016/j.rce.2010.09.007  
6  
7 25 Nourbakhsh E, Anvari R, Nugent K. Abdominal wall hematomas associated with  
8 low-molecular-weight heparins: an important complication in older adults. *J Am*  
9 *Geriatr Soc* 2011;**59**:1543–5. doi:10.1111/j.1532-5415.2011.03529.x  
10  
11 26 Macías-Robles MD, Peliz MG, Gonzalez-Ordóñez AJ. Prophylaxis with enoxaparin  
12 can produce a giant abdominal wall haematoma when associated with low doses of  
13 aspirin among elderly patients suffering cough attacks. *Blood Coagul Fibrinolysis*  
14 *Int J Haemost Thromb* 2005;**16**:217–9.  
15  
16 27 Goldstein JM, Sebire D. Abdominal wall haematoma in the obese: a dangerous  
17 phenomenon. *J Surg Case Rep* 2013;**2013**. doi:10.1093/jscr/rjt060  
18  
19 28 Blüher M. Adipose tissue dysfunction in obesity. *Exp Clin Endocrinol Diabetes Off*  
20 *J Ger Soc Endocrinol Ger Diabetes Assoc* 2009;**117**:241–50. doi:10.1055/s-0029-  
21 1192044  
22  
23 29 Baptista LS, da Silva KR, da Pedrosa CSG, *et al.* Adipose tissue of control and ex-  
24 obese patients exhibit differences in blood vessel content and resident mesenchymal  
25 stem cell population. *Obes Surg* 2009;**19**:1304–12. doi:10.1007/s11695-009-9899-2  
26  
27 30 Spencer M, Unal R, Zhu B, *et al.* Adipose tissue extracellular matrix and vascular  
28 abnormalities in obesity and insulin resistance. *J Clin Endocrinol Metab*  
29 2011;**96**:E1990–1998. doi:10.1210/jc.2011-1567  
30  
31  
32  
33  
34  
35  
36  
37  
38  
39  
40  
41  
42  
43  
44  
45  
46  
47  
48  
49  
50  
51  
52  
53  
54  
55  
56  
57  
58  
59  
60



**STROBE 2007 (v4) Statement—Checklist of items that should be included in reports of *cohort studies***

| Section/Topic                | Item # | Recommendation                                                                                                                                                                       | Reported on page # |
|------------------------------|--------|--------------------------------------------------------------------------------------------------------------------------------------------------------------------------------------|--------------------|
| Title and abstract           | 1      | (a) Indicate the study's design with a commonly used term in the title or the abstract                                                                                               | 1                  |
|                              |        | (b) Provide in the abstract an informative and balanced summary of what was done and what was found                                                                                  | 2                  |
| <b>Introduction</b>          |        |                                                                                                                                                                                      |                    |
| Background/rationale         | 2      | Explain the scientific background and rationale for the investigation being reported                                                                                                 | 4                  |
| Objectives                   | 3      | State specific objectives, including any prespecified hypotheses                                                                                                                     | 4                  |
| <b>Methods</b>               |        |                                                                                                                                                                                      |                    |
| Study design                 | 4      | Present key elements of study design early in the paper                                                                                                                              | 5                  |
| Setting                      | 5      | Describe the setting, locations, and relevant dates, including periods of recruitment, exposure, follow-up, and data collection                                                      | 5-7                |
| Participants                 | 6      | (a) Give the eligibility criteria, and the sources and methods of selection of participants. Describe methods of follow-up                                                           | 5-7                |
|                              |        | (b) For matched studies, give matching criteria and number of exposed and unexposed                                                                                                  | -                  |
| Variables                    | 7      | Clearly define all outcomes, exposures, predictors, potential confounders, and effect modifiers. Give diagnostic criteria, if applicable                                             | 5-7                |
| Data sources/<br>measurement | 8*     | For each variable of interest, give sources of data and details of methods of assessment (measurement). Describe comparability of assessment methods if there is more than one group | 5-7                |
| Bias                         | 9      | Describe any efforts to address potential sources of bias                                                                                                                            | 5-7                |
| Study size                   | 10     | Explain how the study size was arrived at                                                                                                                                            | 5-7                |
| Quantitative variables       | 11     | Explain how quantitative variables were handled in the analyses. If applicable, describe which groupings were chosen and why                                                         | 5-7                |
| Statistical methods          | 12     | (a) Describe all statistical methods, including those used to control for confounding                                                                                                | 6-7                |
|                              |        | (b) Describe any methods used to examine subgroups and interactions                                                                                                                  | 6-7                |
|                              |        | (c) Explain how missing data were addressed                                                                                                                                          | 6-7                |
|                              |        | (d) If applicable, explain how loss to follow-up was addressed                                                                                                                       | -                  |
|                              |        | (e) Describe any sensitivity analyses                                                                                                                                                | -                  |
| <b>Results</b>               |        |                                                                                                                                                                                      |                    |

|                          |     |                                                                                                                                                                                                              |       |
|--------------------------|-----|--------------------------------------------------------------------------------------------------------------------------------------------------------------------------------------------------------------|-------|
| Participants             | 13* | (a) Report numbers of individuals at each stage of study—eg numbers potentially eligible, examined for eligibility, confirmed eligible, included in the study, completing follow-up, and analysed            | -     |
|                          |     | (b) Give reasons for non-participation at each stage                                                                                                                                                         | -     |
|                          |     | (c) Consider use of a flow diagram                                                                                                                                                                           | -     |
| Descriptive data         | 14* | (a) Give characteristics of study participants (eg demographic, clinical, social) and information on exposures and potential confounders                                                                     | 7-9   |
|                          |     | (b) Indicate number of participants with missing data for each variable of interest                                                                                                                          | 7-9   |
|                          |     | (c) Summarise follow-up time (eg, average and total amount)                                                                                                                                                  | -     |
| Outcome data             | 15* | Report numbers of outcome events or summary measures over time                                                                                                                                               | 7-9   |
| Main results             | 16  | (a) Give unadjusted estimates and, if applicable, confounder-adjusted estimates and their precision (eg, 95% confidence interval). Make clear which confounders were adjusted for and why they were included | 7-9   |
|                          |     | (b) Report category boundaries when continuous variables were categorized                                                                                                                                    | 7-9   |
|                          |     | (c) If relevant, consider translating estimates of relative risk into absolute risk for a meaningful time period                                                                                             | -     |
| Other analyses           | 17  | Report other analyses done—eg analyses of subgroups and interactions, and sensitivity analyses                                                                                                               | 7-9   |
| <b>Discussion</b>        |     |                                                                                                                                                                                                              |       |
| Key results              | 18  | Summarise key results with reference to study objectives                                                                                                                                                     | 10-11 |
| <b>Limitations</b>       |     |                                                                                                                                                                                                              |       |
| Interpretation           | 20  | Give a cautious overall interpretation of results considering objectives, limitations, multiplicity of analyses, results from similar studies, and other relevant evidence                                   | 11-12 |
| Generalisability         | 21  | Discuss the generalisability (external validity) of the study results                                                                                                                                        | 10-12 |
| <b>Other information</b> |     |                                                                                                                                                                                                              |       |
| Funding                  | 22  | Give the source of funding and the role of the funders for the present study and, if applicable, for the original study on which the present article is based                                                | -     |

\*Give information separately for cases and controls in case-control studies and, if applicable, for exposed and unexposed groups in cohort and cross-sectional studies.

**Note:** An Explanation and Elaboration article discusses each checklist item and gives methodological background and published examples of transparent reporting. The STROBE checklist is best used in conjunction with this article (freely available on the Web sites of PLoS Medicine at <http://www.plosmedicine.org/>, Annals of Internal Medicine at <http://www.annals.org/>, and Epidemiology at <http://www.epidem.com/>). Information on the STROBE Initiative is available at [www.strobe-statement.org](http://www.strobe-statement.org).

# BMJ Open

## Compliance with current VTE prophylaxis guidelines and risk factors linked to complications of VTE prophylaxis in medical inpatients: a prospective cohort study in a Spanish Internal Medicine Department.

|                                 |                                                                                                                                                                                                                                                                                                                                                                                                                                                                                                                                                                                        |
|---------------------------------|----------------------------------------------------------------------------------------------------------------------------------------------------------------------------------------------------------------------------------------------------------------------------------------------------------------------------------------------------------------------------------------------------------------------------------------------------------------------------------------------------------------------------------------------------------------------------------------|
| Journal:                        | <i>BMJ Open</i>                                                                                                                                                                                                                                                                                                                                                                                                                                                                                                                                                                        |
| Manuscript ID                   | bmjopen-2017-021288.R2                                                                                                                                                                                                                                                                                                                                                                                                                                                                                                                                                                 |
| Article Type:                   | Research                                                                                                                                                                                                                                                                                                                                                                                                                                                                                                                                                                               |
| Date Submitted by the Author:   | 20-Mar-2018                                                                                                                                                                                                                                                                                                                                                                                                                                                                                                                                                                            |
| Complete List of Authors:       | Novo-Veleiro, Ignacio; Complejo Hospitalario Universitario de Santiago de Compostela, Internal Medicine<br>Alvela-Suárez, Lucía; Hospital HM Rosaleda, Internal Medicine<br>Costa-Grille, Alba; Complejo Hospitalario Universitario de Santiago de Compostela, Internal Medicine<br>Suárez-Dono, Javier; Complejo Hospitalario Universitario de Santiago de Compostela, Internal Medicine<br>Ferrón-Vidan, Fernando; Complejo Hospitalario Universitario de Santiago de Compostela, Internal Medicine<br>Reino, Antonio; Complejo Hospitalario Universitario de Santiago de Compostela |
| <b>Primary Subject Heading</b>: | Haematology (incl blood transfusion)                                                                                                                                                                                                                                                                                                                                                                                                                                                                                                                                                   |
| Secondary Subject Heading:      | Geriatric medicine, Medical management, Patient-centred medicine                                                                                                                                                                                                                                                                                                                                                                                                                                                                                                                       |
| Keywords:                       | Thromboembolism < CARDIOLOGY, GERIATRIC MEDICINE, Bleeding disorders & coagulopathies < HAEMATOLOGY                                                                                                                                                                                                                                                                                                                                                                                                                                                                                    |
|                                 |                                                                                                                                                                                                                                                                                                                                                                                                                                                                                                                                                                                        |

SCHOLARONE™  
Manuscripts

1  
2  
3 **Title:** Compliance with current VTE prophylaxis guidelines and risk factors linked to  
4 complications of VTE prophylaxis in medical inpatients: a prospective cohort study in a  
5 Spanish Internal Medicine Department.  
6  
7  
8  
9

10  
11 **Authors:** Ignacio Novo-Veleiro<sup>1\*</sup>, Lucía Alvela-Suárez<sup>2</sup>, Alba Costa-Grille<sup>3</sup>, Javier  
12 Suárez-Dono<sup>1</sup>, Fernando Ferrón-Vidán<sup>1</sup>, Antonio Pose-Reino<sup>1</sup>.  
13  
14  
15

16  
17  
18 **Filiations:**

19  
20 <sup>1</sup> Internal Medicine Department. University Hospital of Santiago de Compostela. A  
21 Coruña. Spain.  
22

23  
24 <sup>2</sup> Internal Medicine Department. HM Rosaleda Hospital. Santiago de Compostela. A  
25 Coruña. Spain.  
26

27  
28 <sup>3</sup> Geriatrics Department. University Hospital of Getafe. Madrid. Spain.  
29  
30  
31  
32  
33  
34  
35  
36  
37  
38  
39  
40  
41  
42  
43

44 **\*Corresponding author:** Ignacio Novo-Veleiro. Internal Medicine Department.  
45 University Hospital of Santiago de Compostela. A Coruña. Spain. 15701. Tel. +34  
46 981951725. Email: ignacio.novo.veleiro@gmail.com.  
47  
48  
49  
50  
51  
52  
53  
54  
55  
56  
57  
58  
59  
60

1  
2  
3 ABSTRACT:  
4

5 *Objectives:* the main objectives were to evaluate the degree of compliance with  
6 current guidelines regarding venous thromboembolism (VTE) prophylaxis in medical  
7 patients during admission and to identify risk factors linked to complications of this  
8 prophylaxis.  
9  
10  
11  
12

13  
14 *Design:* a prospective cohort study was conducted.  
15

16  
17 *Setting:* Internal Medicine Department of the University Hospital of Santiago de  
18 Compostela (tertiary referral hospital).  
19  
20

21  
22 *Participants:* 396 hospitalized, non-surgical elderly patients with no active or  
23 previous oral anticoagulation or low molecular weight heparin (LMWH) treatment  
24 (during the previous year) and who received VTE prophylaxis during admission.  
25  
26  
27

28  
29 *Primary and secondary outcome measures:* the degree of compliance with the  
30 current guidelines was estimated by calculating PADOVA and IMPROVE indexes in  
31 all cases. We analysed the development of the following complications: major and  
32 minor bleeding, major and minor hematoma and decrease of platelet count.  
33  
34  
35  
36

37  
38 *Results:* we found that VTE prophylaxis was correctly indicated in 88.4% of  
39 patients. We found 2 (0.5%) major bleeding, 17 (4.3%) minor bleeding, 30 (7.6%)  
40 platelet count decrease, 29 (7.3%) major hematoma and 82 (20.7%) minor hematoma.  
41  
42 After a multivariate logistic regression analysis, the presence of major hematomas was  
43 linked to obesity (OR=4.1; IC 95% 1.8–9.2;  $P = 0.001$ ), concomitant antiplatelet  
44 treatment (OR=2.7; IC 95% 1.1–6.5;  $P = 0.03$ ) and enoxaparin use (OR=3.5; IC 95%  
45 1.1–10.9;  $P = 0.029$ ) and the presence of minor hematomas was associated with  
46 PADOVA index < 4 points (OR=3.1; IC 95% 1.5–6.4;  $P = 0.003$ ) and Diabetes Mellitus  
47 (OR=2; IC 95% 1.1–3.7;  $P = 0.031$ ).  
48  
49  
50  
51  
52  
53  
54  
55  
56  
57  
58  
59  
60

1  
2  
3 *Conclusions:* complications during VTE prophylaxis in elderly hospitalized  
4 medical patients are frequent despite a correct application of current guidelines. The  
5 main factors linked to hematomas were obesity and concomitant antiplatelet treatment  
6 and their presence should lead physicians to exercise extreme caution. The use of  
7 tinzaparin for VTE prophylaxis in these patients could have a better safety profile.  
8  
9  
10  
11  
12

#### 13 14 15 16 STRENGTHS AND LIMITATIONS OF THIS STUDY:

##### 17 18 19 *Strengths:*

- 20 -Clinical study in elderly patients, who are usually excluded from large studies.
- 21
- 22 -Analysis of compliance with current guidelines in VTE prophylaxis in real-life  
23 conditions.
- 24
- 25 -Detection of minor complications and risk factors that have usually been  
26 underestimated in previous studies.
- 27
- 28
- 29
- 30
- 31
- 32
- 33

##### 34 35 36 *Limitations:*

- 37 -Observational study conducted in only one department of a single hospital,  
38 which did not allow for a correct homogenization of subgroups.
- 39
- 40
- 41 -The inclusion of patients with VTE prophylaxis only could be a selection bias.
- 42
- 43
- 44
- 45
- 46

47 FUNDING STATEMENT: this research received no specific grant from any  
48 funding agency in the public, commercial or not-for-profit sectors.  
49

50  
51  
52  
53  
54 COMPETING INTERESTS STATEMENT: all authors declare that they have  
55 no competing interests.  
56  
57

## INTRODUCTION:

Low molecular weight heparin (LMWH) use is extended in hospitalized patients, since most of them meet high-risk criteria for venous and pulmonary embolism [1]. These criteria have been re-defined by the American College of Chest Physicians and place an emphasis on calculating the risk of venous thromboembolism (VTE) development and the bleeding risk before starting VTE prophylaxis on both surgical and non-surgical inpatients [2,3]. In these sense, it is worth noting that the factors linked to a higher bleeding risk have been intensely analysed in patients who underwent surgical procedures; but there is lack of data in the case of non-surgical patients [4]. Moreover, the occurrence of some non-life-threatening secondary effects, like abdominal hematomas, has been poorly studied during VTE prophylaxis in non-surgical patients [5].

The alignment of real daily clinical practice with the current recommendations is another interesting point that deserves attention. Previous studies showed an acceptable match between guidelines and clinical practice in surgical patients but, again, only a few observational studies in non-surgical patients have analysed this fact [1,6–8].

The aim of the present study was, therefore, on the one hand, to analyse compliance with current VTE prophylaxis guidelines in non-surgical patients in an Internal Medicine Department and, on the other hand, to describe the incidence of major and minor secondary effects with LMWH prophylaxis and to detect potential risk factors linked to them.

1  
2  
3 PATIENTS AND METHODS:  
4

5 The inclusion criteria were: hospitalized non-surgical patients with no active or  
6 previous oral anticoagulation or LMWH treatment (during the previous year). There  
7 was no restriction regarding the cause of hospital admission. In all cases physicians  
8 indicated VTE prophylaxis with no intervention from the study staff. Written informed  
9 consent was obtained from all patients and data collection was performed through a  
10 personal interview by trained staff and a review of their electronic medical history.  
11  
12  
13  
14  
15  
16  
17

18 Age-adjusted Charlson's index (ACI) was used to assess the comorbidity degree  
19 of the patients included [9]. We also applied the Barthel's index (BI) to calculate  
20 functional status [10], the CONUT Score (CS) to detect and establish nutritional  
21 deficiencies [11] and the Pfeiffer's test (PT) to conduct a mental status evaluation of all  
22 the patients included [12].  
23  
24  
25  
26  
27  
28  
29

30 In light of current recommendations, the PADOVA index was calculated in all  
31 cases to check the adequacy of the clinical practice to guidelines [4]. VTE prophylaxis  
32 was considered as indicated with at least 4 points in PADOVA index [13]. On the other  
33 hand, the IMPROVE index was used to calculate bleeding risk, considering as high-risk  
34 patients those with at least 7 points [14].  
35  
36  
37  
38  
39  
40

41 Chronic Kidney Disease (CKD) was assessed in patients with decreased  
42 glomerular filtration rate (GFR) (<60 mL/min) for at least 3 months before admission,  
43 following current guidelines [15]. Acute Kidney Injury (AKI) was considered in  
44 patients with GFR < 60 mL/min at admission without previous diagnosis of CKD.  
45 Patients with previous CKD and worsening of GFR at admission were coded as CKD  
46 exacerbation (CKDE). GFR was calculated using 2009 CKD-Epidemiology  
47 Collaboration (EPI) creatinine equation in all cases [16].  
48  
49  
50  
51  
52  
53  
54  
55  
56  
57  
58  
59  
60



1  
2  
3 As to obesity, it was considered in all patients with a Body Mass Index (BMI)  
4 over 30 kg/m<sup>2</sup>. For the main alterations in blood count we applied World Health  
5 Association (WHO) criteria for anemia and we coded as thrombocytopenia at admission  
6 all patients with values under 120000/ $\mu$ L. As to coagulation tests alterations, we  
7 considered them in all cases with an International Normalized Ratio (INR) over 1.2 or  
8 Activated Partial Thromboplastin Time (APTT) over 35 seconds.  
9  
10  
11  
12  
13  
14  
15

16 The heparin types available in our center for the duration of the study were only  
17 enoxaparin and tinzaparin, which are therefore the only heparins included in our  
18 analysis.  
19  
20  
21  
22

23 With regard to the analysed complications, we defined them as follows:

24  
25 -Major bleeding: gastrointestinal or intracranial bleeding, haemoptysis, epistaxis  
26 or haematuria with a decrease of at least 2 g/dL in haemoglobin level.  
27  
28  
29

30 -Minor bleeding: haemoptysis, epistaxis or haematuria without changes in  
31 haemoglobin levels or with a decrease of less than 2 g/dL.  
32  
33  
34

35 -Platelet count decrease: loss of at least 50% compared to the baseline value.  
36  
37

38 -Major hematoma: retroperitoneal or straight abdominal muscles locations were  
39 considered as major hematoma in all cases. We also considered as major hematoma an  
40 abdominal hematoma in other locations which implied a loss of at least 2 points in  
41 hemoglobin levels.  
42  
43  
44  
45

46 -Minor hematoma: abdominal wall hematoma (any location) with an extension  
47 of more than 5 cm without hemoglobin loss or with a hemoglobin loss lower than 2  
48 points. We also considered as minor hematoma all abdominal wall hematomas of any  
49 extension, which caused symptoms like pain or pruritus requiring specific treatment.  
50  
51  
52  
53  
54  
55  
56  
57  
58  
59  
60

1  
2  
3 -Pulmonary embolism (PE): we coded all cases diagnosed during hospital stay  
4 which were undiagnosed and unsuspected at admission.  
5

6  
7 -Deep venous thrombosis (DVT): we considered all cases diagnosed during  
8 hospital stay which were undiagnosed and unsuspected at admission.  
9

10  
11 A descriptive analysis was performed by calculating qualitative-variable rates  
12 plus mean and standard deviation. We used the Chi-square test or Fisher's exact test, as  
13 appropriate (expected frequency value <5), to compare qualitative variables, and the  
14 Student's t test for quantitative variables. A multivariate logistic regression analysis was  
15 conducted to identify factors associated with complications. A *P*-value <0.05 was  
16 regarded as significant. All analyses were performed using the SPSS v. 22.0 software  
17 package (SPSS Inc., Chicago, IL, USA).  
18  
19  
20  
21  
22  
23  
24  
25  
26

27 The protocol of the present study was reviewed and approved by the Clinical  
28 Investigations Ethical Committee of Galicia.  
29  
30  
31

### 32 33 34 35 *Patient and Public Involvement* 36

37 There were no patient or public involvement in the development of the study  
38 design, protocol, recruitment or dissemination of results.  
39  
40  
41  
42  
43  
44

### 45 RESULTS: 46

47 We included 396 consecutive inpatients that were given VTE prophylaxis during  
48 their hospital stay. Regarding gender, 51.8% were women and the global mean age was  
49 80.7 years (Standard Deviation [SD] = 11.5, Range = 22 - 107), 91% of patients were  
50 over 65 years old. Only 32 patients (8.1%) lived in nursing homes and the average  
51  
52  
53  
54  
55  
56  
57  
58  
59  
60

scores of the different classification tools applied at admission were: ACI 5.5 (SD = 2.2) points, BI 55.5 (SD = 35.5) points, PT 3.3 (SD = 3) mistakes and CS 6.2 (SD = 2.6) points. CKD was present in 91 (23.2%) patients and Diabetes Mellitus in 111 (28.3%) of them, as well as obesity (111 patients). Other remarkable comorbidities were active cancer (37 patients, 9.5%) and haematological diseases (9 patients, 2.5%) The complete baseline characteristics and frequencies of the main thrombosis risk factors are detailed in Table 1.

Table 1. Global baseline characteristics and analysis of differences regarding the type of LMWH used for VTE prophylaxis.

| Variable               | Global (396) | Tinzaparin (120) | Enoxaparin (276) | P      |
|------------------------|--------------|------------------|------------------|--------|
| Male                   | 191 (48)     | 57 (47.5)        | 134 (48.5)       | 0.848  |
| Age                    | 80.7 (11.6)  | 83 (9.6)         | 79.8 (12.2)      | 0.083  |
| CKD                    | 91 (23)      | 43 (36)          | 48 (17)          | <0.001 |
| Diabetes mellitus      | 112 (28)     | 38 (32)          | 74 (27)          | 0.324  |
| Neoplasia              | 37 (9)       | 11 (9)           | 26 (9)           | 0.928  |
| Obesity                | 113 (28.5)   | 30 (25)          | 83 (30)          | 0.342  |
| Previous VTE           | 4 (1)        | 3 (2.5)          | 1 (0.4)          | 0.085  |
| 30-day surgery         | 5 (1)        | 1 (1)            | 4 (1.5)          | 0.521  |
| Stroke                 | 49 (12)      | 13 (11)          | 36 (13)          | 0.539  |
| Autoimmune disease     | 17 (4)       | 2 (2)            | 15 (5.5)         | 0.089  |
| Liver disease          | 24 (6)       | 8 (7)            | 16 (5.5)         | 0.739  |
| Antiplatelet treatment | 182 (46)     | 53 (44)          | 129 (47)         | 0.271  |
| Infectious disease     | 316 (80)     | 92 (77)          | 224 (81)         | 0.306  |
| Anemia                 | 156 (39)     | 54 (45)          | 102 (37)         | 0.116  |
| AKI                    | 95 (24)      | 41 (34)          | 54 (19.5)        | 0.002  |
| CKD exacerbation       | 79 (20)      | 39 (32.5)        | 40 (14.5)        | <0.001 |
| Heart failure          | 137 (34.5)   | 50 (42)          | 87 (31.5)        | 0.051  |
| PADOVA > 4             | 342 (86)     | 112 (93)         | 230 (83)         | 0.001  |
| IMPROVE > 7            | 24 (6)       | 9 (7.5)          | 15 (5.5)         | 0.387  |
| BARTHEL < 20           | 56 (14)      | 21 (17.5)        | 35 (13)          | 0.218  |
| PFEIFFER > 5           | 154 (39)     | 51 (42.5)        | 103 (37)         | 0.257  |

Data are showed as n (%) or mean (SD). CKD: Chronic Kidney Disease. VTE: Venous Thromboembolism. AKI: Acute Kidney Injury.

After the application of the PADOVA index, we found that VTE prophylaxis was correctly indicated in 88.4% of patients following these criteria, which means a prescription of VTE prophylaxis in 46 low-risk patients. In the case of the IMPROVE

1  
2  
3 index, we found that 6.3% of patients had a high theoretical bleeding risk, which should  
4 advise against VTE prophylaxis prescription. 22 patients (5.7%) fulfilled both  
5 PADOVA and IMPROVE criteria, which means concomitant high VTE and bleeding  
6 risk. We only found 2 patients (0.5%) with less than 4 points in the PADOVA index and  
7 high bleeding risk in the IMPROVE index.  
8  
9  
10  
11  
12

13  
14       Regarding their general condition at admission, 316 (79.8%) patients presented  
15 with an infection, 155 (39.1%) had anaemia, 137 (34.6%) had an acute heart failure, 95  
16 (24%) met AKI criteria and 79 (19.9) met CKDE criteria. As to platelet count and  
17 coagulation tests, 93 (23.5%) patients had an alteration on coagulation tests at  
18 admission and 27 (6.8%) had thrombocytopenia.  
19  
20  
21  
22  
23  
24

25       Considering the VTE prophylaxis, the most used LMWH was enoxaparin  
26 (69.7% of cases) followed by tinzaparin (30.3%) and the mean duration was 12 (SD =  
27 11.8) days. The most commonly used treatment regimens were 4000 International Units  
28 (IU) daily for enoxaparin (219 patients) and 3500 IU daily for tinzaparin (103 patients).  
29 The dose adjustment in patients with CKD, CKDE or AKI was correct in all cases. We  
30 did not register any episode of VTE during the study period.  
31  
32  
33  
34  
35  
36  
37  
38

39       With regard to complications, we found 2 patients (0.5%) who presented with  
40 major bleeding, 17 (4.3%) with a minor bleeding episode, 30 (7.6%) developed a  
41 platelet count decrease, 29 (7.3%) had a major hematoma (9 located in straight  
42 abdominal muscles and 20 in other abdominal locations) and 82 (20.7%) had a minor  
43 hematoma. All patients who developed complications were managed through  
44 conservative treatment and the course was favourable in all cases. After the univariate  
45 analysis, we found an association between minor bleeding and the presence of anaemia  
46 at admission and AKI. In the case of major hematomas, this analysis showed significant  
47 differences in patients with obesity, concomitant antiplatelet treatment, an infection or  
48  
49  
50  
51  
52  
53  
54  
55  
56  
57  
58  
59  
60

1  
2  
3 heart failure as main cause of admission and the use of enoxaparin. With regard to  
4  
5 minor hematomas, we found an association with diabetes and a PADOVA index lower  
6  
7 than 4 points. Finally, a platelet count decrease was only linked to an infection as the  
8  
9 cause of admission and it was not associated with the other analysed complications.  
10

11  
12 After performing a multivariable analysis none of the variables showed an  
13  
14 association with minor bleeding or platelet count decrease. The presence of major  
15  
16 hematomas was linked to obesity (OR = 4.1; IC 95% 1.8 – 9.2;  $P = 0.001$ ), concomitant  
17  
18 antiplatelet treatment (OR = 2.7; IC 95% 1.1 – 6.5;  $P = 0.03$ ) and enoxaparin use (OR =  
19  
20 3.5; IC 95% 1.1 – 10.9;  $P = 0.029$ ) and the presence of minor hematomas was  
21  
22 associated with the absence of indication of VTE prophylaxis following  
23  
24 recommendations (PADOVA index < 4 points) (OR = 3.1; IC 95% 1.5 – 6.4;  $P = 0.003$ )  
25  
26 and the presence of Diabetes Mellitus (OR = 2; IC 95% 1.1 – 3.7;  $P = 0.031$ ).  
27  
28

29  
30 In view of these results, we performed a sub-analysis to compare the clinical  
31  
32 profile of patients who received enoxaparin and tinzaparin, which showed significant  
33  
34 differences regarding renal function only, as shown in Table 1.  
35  
36  
37  
38

### 39 DISCUSSION:

40  
41  
42 The present study shows, for the first time to our knowledge, an exhaustive  
43  
44 analysis of clinically relevant complications during VTE prophylaxis in non-surgical  
45  
46 patients and the main risk factors linked to them.  
47  
48

49  
50 As to the adaptation of the clinical practice to current guidelines, the high degree  
51  
52 of compliance observed is remarkable. There is, however, a narrow margin for  
53  
54 improvement, particularly in the case of over-prescription in low-risk patients. Our  
55  
56 study included only patients with VTE prophylaxis during hospital stay, which makes  
57  
58  
59  
60

1  
2  
3 the comparison with studies like ENDORSE or AVAIL ME difficult as they showed  
4  
5 lower percentages of correct application of recommendations, even as low as below  
6  
7 50% [17,18].  
8

9  
10 Another relevant difference of our study is that it is exclusively confined to  
11  
12 medical patients, as well as the extremely high age and degree of comorbidity of our  
13  
14 cohort, compared with larger series where patients with a mean age more than 10 years  
15  
16 lower and very low rates of multiple comorbidity were included [19,20].  
17

18  
19 The absence of VTE cases in our study reflects a high efficacy of VTE  
20  
21 prophylaxis in medical patients, which has been largely studied and supported by high-  
22  
23 quality evidence [21,22].  
24

25  
26 With respect to complications, we analyzed minor complications, like  
27  
28 hematomas, that are usually undervalued by physicians, but for patients are important.  
29  
30 Indeed, we consider that our results could help physicians to improve their daily clinical  
31  
32 practice and the patient's experience during a hospital admission by adding tools to  
33  
34 detect patients at risk of developing these complications.  
35

36  
37 As far as bleeding episodes are concerned, they were infrequent. Despite this,  
38  
39 the association between anemia and minor bleeding could reflect the existence of  
40  
41 previous digestive bleeding, increased during admission by LMWH, and the association  
42  
43 with AKI could be explained by a heparin over-effect in these patients, although we did  
44  
45 not detect significant rates of unadjusted dosage in our cohort. In fact, an increased  
46  
47 bleeding risk was one of the main risk factors considered on the IMPROVE score,  
48  
49 although anemia was not a useful marker of bleeding risk in that study [14]. Thus, our  
50  
51 results could contribute to expand the tools available to identify patients with high  
52  
53 bleeding risk before prescribing VTE prophylaxis.  
54  
55  
56  
57  
58  
59  
60

1  
2  
3 In the case of major hematomas, we must underscore the relatively high  
4 percentage of patients who developed these complications. Despite the clinical  
5 relevance of abdominal and retroperitoneal hematomas, large series did not analyze  
6 these complications and we can only compare our results with small series and case  
7 reports [14,18,23,24]. In this sense, previous reports suggested an estimated incidence  
8 of 5% for abdominal hematomas in patients receiving VTE prophylaxis, which could be  
9 comparable to ours [25]. With regard to risk factors, previous studies showed that  
10 elderly patients had a higher risk of abdominal hematomas [23,25,26]; we did not  
11 identify this association, probably because of the little number of patients aged below  
12 65 years. Concomitant antiplatelet treatment has been identified as a risk factor linked  
13 to hematomas by other authors, due to the synergic action with LMWH, and our  
14 findings reinforce the importance of assessing the need to maintain these drugs during  
15 hospital admission in elderly patients [23,25,26]. Obesity has also been described as a  
16 risk factor in previous studies [25,27], and this relationship could be due to an adipose  
17 tissue dysfunction in obese patients, linked to an abnormal subcutaneous vascularization  
18 and extracellular matrix changes [28–30]. These alterations lead to a higher risk of local  
19 hematomas in obese patients under VTE prophylaxis, independently of the plasmatic  
20 levels of LMWH achieved [26].  
21  
22  
23  
24  
25  
26  
27  
28  
29  
30  
31  
32  
33  
34  
35  
36  
37  
38  
39  
40  
41

42 As to the different LMWH used in our study, we found a lower risk of major  
43 hematomas with tinzaparin as the only significant difference. Interestingly, the  
44 characteristics of patients treated with both of them were different regarding renal  
45 function, so the use of tinzaparin in patients with poorer renal function could have  
46 alerted physicians to the need of better dose adjustment. Thus, it could be considered as  
47 a potential selection bias, which should be taken into account during the interpretation  
48 of our results. Despite this, a potential superior safety profile in elderly patients with  
49  
50  
51  
52  
53  
54  
55  
56  
57  
58  
59  
60

1  
2  
3 high comorbidity emerges and even differences in device, needles and mode of  
4 administration should be considered. Further studies will be necessary to properly  
5 establish this difference.  
6  
7

8  
9  
10 As to minor hematomas, it is remarkable that this complication is not usually  
11 considered as clinically relevant. However, we decided to include it as we considered  
12 that it is completely relevant for our patients. In this sense, the association with a  
13 PADOVA index lower than 4 points cannot be considered as a risk factor itself, but it  
14 helps us to highlight the importance of a correct application of VTE prophylaxis  
15 guidelines. In the case of Diabetes Mellitus, it has not been previously described as a  
16 risk factor for abdominal hematomas development but microvascular diabetic  
17 complications might underlie this association [25].  
18  
19  
20  
21  
22  
23  
24  
25

26  
27  
28 Despite the high percentage of patients with alterations in coagulation tests  
29 (23.5%), we found no association between these alterations and the related  
30 complications. This could be due to the little relevance of most of alterations in  
31 coagulation tests, consisting of small increments of INR or APTT.  
32  
33  
34  
35

36  
37 In light of our results, we think that the presence of any risk factor for the  
38 development of major or minor complications linked to VTE prophylaxis should lead  
39 physicians to a meditation, before its prescription, about the indication, dosage and time  
40 of treatment, particularly in elderly patients.  
41  
42  
43  
44  
45  
46  
47

#### 48 CONCLUSIONS:

49  
50  
51 The development of complications during VTE prophylaxis in elderly  
52 hospitalized medical patients is higher than that expected in other populations even  
53 when the current guidelines are correctly applied. The main factors linked to hematomas  
54  
55  
56  
57  
58  
59



1  
2  
3 in our cohort were obesity and concomitant antiplatelet treatment and their presence  
4 should lead physicians to exercise extreme caution. The use of tinzaparin for VTE  
5 prophylaxis in these patients could have a better safety profile.  
6  
7  
8  
9  
10

11  
12 AUTHOR'S CONTRIBUTIONS:

13  
14  
15 -Study concept and design: Drs. Antonio Pose-Reino, Ignacio Novo-Veleiro  
16 and Lucía Alvela-Suárez.  
17

18  
19 -Acquisition of subjects and/or data: Drs. Ignacio Novo-Veleiro, Lucía  
20 Alvela-Suárez and Alba Costa-Grille.  
21

22  
23 -Analysis and interpretation of data: Drs. Ignacio Novo-Veleiro, Javier  
24 Suárez-Dono, Fernando Ferrón-Vidán and Antonio Pose-Reino.  
25

26  
27 -Preparation of manuscript: Drs. Ignacio Novo-Veleiro, Lucía Alvela-Suárez  
28 and Antonio Pose-Reino.  
29  
30  
31  
32  
33  
34

35 DATA SHARING STATEMENT: Technical appendix, statistical code, and  
36 dataset will be available from the Dryad repository if required.  
37  
38  
39  
40  
41  
42

43 FUNDING STATEMENT: this research received no specific grant from any  
44 funding agency in the public, commercial or not-for-profit sectors.  
45  
46  
47  
48  
49

50 COMPETING INTERESTS STATEMENT: all authors declare that they have  
51 no competing interests.  
52  
53  
54  
55  
56  
57  
58  
59  
60

1  
2  
3  
4  
5  
6  
7  
8  
9  
10  
11  
12  
13  
14  
15  
16  
17  
18  
19  
20  
21  
22  
23  
24  
25  
26  
27  
28  
29  
30  
31  
32  
33  
34  
35  
36  
37  
38  
39  
40  
41  
42  
43  
44  
45  
46  
47  
48  
49  
50  
51  
52  
53  
54  
55  
56  
57  
58  
59  
60

For peer review only

## REFERENCES

- 1 Nieto Rodríguez JA, ENDORSE. [Venous thromboembolism risk and antithrombotic prophylaxis among patients admitted to Spanish hospitals (ENDORSE study)]. *Med Clin (Barc)* 2009;**133**:1–7. doi:10.1016/j.medcli.2009.01.040
- 2 Gould MK, García DA, Wren SM, *et al.* Prevention of VTE in nonorthopedic surgical patients: Antithrombotic Therapy and Prevention of Thrombosis, 9th ed: American College of Chest Physicians Evidence-Based Clinical Practice Guidelines. *Chest* 2012;**141**:e227S–e277S. doi:10.1378/chest.11-2297
- 3 Falck-Ytter Y, Francis CW, Johanson NA, *et al.* Prevention of VTE in orthopedic surgery patients: Antithrombotic Therapy and Prevention of Thrombosis, 9th ed: American College of Chest Physicians Evidence-Based Clinical Practice Guidelines. *Chest* 2012;**141**:e278S–e325S. doi:10.1378/chest.11-2404
- 4 Kahn SR, Lim W, Dunn AS, *et al.* Prevention of VTE in nonsurgical patients: Antithrombotic Therapy and Prevention of Thrombosis, 9th ed: American College of Chest Physicians Evidence-Based Clinical Practice Guidelines. *Chest* 2012;**141**:e195S–e226S. doi:10.1378/chest.11-2296
- 5 Decousus H, Tapson VF, Bergmann J-F, *et al.* Factors at admission associated with bleeding risk in medical patients: findings from the IMPROVE investigators. *Chest* 2011;**139**:69–79. doi:10.1378/chest.09-3081
- 6 Ruiz-Artacho P, Pérez Peña C, Iriarte A, *et al.* [Adequation of thromboprophylaxis during former admission in patients attended in emergencies with thromboembolic disease]. *Med Clin (Barc)* 2013;**141**:130–1. doi:10.1016/j.medcli.2012.12.014
- 7 Gallardo Jiménez P, Guijarro Merino R, Vallejo Herrera V, *et al.* [Assessment of venous thromboembolism risk in hospitalized medical patients. Concordance between PRETEMED guide and the recommendations of the viii conference of the American College of Chest Physicians]. *Med Clin (Barc)* 2012;**139**:467–72. doi:10.1016/j.medcli.2011.07.022
- 8 Borobia AM, Fernández Capitán C, Iniesta Arandia N, *et al.* [Risk of thromboembolic events and evaluation of the use of venous thromboembolism prophylaxis in hospitalized medical patients and after discharge]. *Rev Clin Esp* 2009;**209**:15–20.
- 9 Charlson ME, Pompei P, Ales KL, *et al.* A new method of classifying prognostic comorbidity in longitudinal studies: development and validation. *J Chronic Dis* 1987;**40**:373–83.
- 10 Mahoney FI, Barthel DW. FUNCTIONAL EVALUATION: THE BARTHEL INDEX. *Md State Med J* 1965;**14**:61–5.
- 11 Ignacio de Ulíbarri J, González-Madroño A, de Villar NGP, *et al.* CONUT: a tool for controlling nutritional status. First validation in a hospital population. *Nutr Hosp* 2005;**20**:38–45.
- 12 Pfeiffer E. A short portable mental status questionnaire for the assessment of organic brain deficit in elderly patients. *J Am Geriatr Soc* 1975;**23**:433–41.
- 13 Barbar S, Noventa F, Rossetto V, *et al.* A risk assessment model for the identification of hospitalized medical patients at risk for venous thromboembolism: the Padua Prediction Score. *J Thromb Haemost JTH* 2010;**8**:2450–7. doi:10.1111/j.1538-7836.2010.04044.x
- 14 Hostler DC, Marx ES, Moores LK, *et al.* Validation of the International Medical Prevention Registry on Venous Thromboembolism Bleeding Risk Score. *Chest* 2016;**149**:372–9. doi:10.1378/chest.14-2842

- 1  
2  
3 15 National Guideline Clearinghouse (NGC). Guideline summary: KDIGO 2012  
4 clinical practice guideline for the evaluation and management of chronic kidney disease.  
5 In: National Guideline Clearinghouse (NGC) [Web site]. Rockville (MD): Agency for  
6 Healthcare Research and Quality (AHRQ); 2013 Jan 01. [cited 2017 Jun 29]. Available:  
7 <https://www.guideline.gov>.
- 8 16 Levey AS, Stevens LA, Schmid CH, *et al*. A new equation to estimate  
9 glomerular filtration rate. *Ann Intern Med* 2009;**150**:604–12.
- 10 17 Taher AT, Aoun J, Salameh P. The AVAIL ME study: a multinational survey of  
11 VTE risk and prophylaxis. *J Thromb Thrombolysis* 2011;**31**:47–56.  
12 doi:10.1007/s11239-010-0492-2
- 13 18 Cohen AT, Tapson VF, Bergmann J-F, *et al*. Venous thromboembolism risk and  
14 prophylaxis in the acute hospital care setting (ENDORSE study): a multinational cross-  
15 sectional study. *Lancet Lond Engl* 2008;**371**:387–94. doi:10.1016/S0140-  
16 6736(08)60202-0
- 17 19 Nieto JA, Cámara T, Camacho I, *et al*. Venous thromboembolism prophylaxis in  
18 acutely ill hospitalized medical patients. A retrospective multicenter study. *Eur J Intern*  
19 *Med* 2014;**25**:717–23. doi:10.1016/j.ejim.2014.07.005
- 20 20 Tapson VF, Decousus H, Pini M, *et al*. Venous thromboembolism prophylaxis  
21 in acutely ill hospitalized medical patients: findings from the International Medical  
22 Prevention Registry on Venous Thromboembolism. *Chest* 2007;**132**:936–45.  
23 doi:10.1378/chest.06-2993
- 24 21 Francis CW. Clinical practice. Prophylaxis for thromboembolism in hospitalized  
25 medical patients. *N Engl J Med* 2007;**356**:1438–44. doi:10.1056/NEJMcp067264
- 26 22 Dentali F, Douketis JD, Gianni M, *et al*. Meta-analysis: anticoagulant  
27 prophylaxis to prevent symptomatic venous thromboembolism in hospitalized medical  
28 patients. *Ann Intern Med* 2007;**146**:278–88.
- 29 23 Triscott J, Mercer S, Tian PGJ, *et al*. Retroperitoneal haematoma associated with  
30 enoxaparin use in an elderly woman with chronic kidney disease. *BMJ Case Rep*  
31 2015;**2015**. doi:10.1136/bcr-2015-211699
- 32 24 Madridano O, Martín Del Pozo M, Masso P, *et al*. [Hematoma of the rectus  
33 abdominis muscle in patients treated with low-molecular-weight heparin: four clinical  
34 cases]. *Rev Clin Esp* 2011;**211**:109–10. doi:10.1016/j.rce.2010.09.007
- 35 25 Nourbakhsh E, Anvari R, Nugent K. Abdominal wall hematomas associated  
36 with low-molecular-weight heparins: an important complication in older adults. *J Am*  
37 *Geriatr Soc* 2011;**59**:1543–5. doi:10.1111/j.1532-5415.2011.03529.x
- 38 26 Macías-Robles MD, Peliz MG, Gonzalez-Ordóñez AJ. Prophylaxis with  
39 enoxaparin can produce a giant abdominal wall haematoma when associated with low  
40 doses of aspirin among elderly patients suffering cough attacks. *Blood Coagul*  
41 *Fibrinolysis Int J Haemost Thromb* 2005;**16**:217–9.
- 42 27 Goldstein JM, Sebire D. Abdominal wall haematoma in the obese: a dangerous  
43 phenomenon. *J Surg Case Rep* 2013;**2013**. doi:10.1093/jscr/rjt060
- 44 28 Blüher M. Adipose tissue dysfunction in obesity. *Exp Clin Endocrinol Diabetes*  
45 *Off J Ger Soc Endocrinol Ger Diabetes Assoc* 2009;**117**:241–50. doi:10.1055/s-0029-  
46 1192044
- 47 29 Baptista LS, da Silva KR, da Pedrosa CSG, *et al*. Adipose tissue of control and  
48 ex-obese patients exhibit differences in blood vessel content and resident mesenchymal  
49 stem cell population. *Obes Surg* 2009;**19**:1304–12. doi:10.1007/s11695-009-9899-2
- 50 30 Spencer M, Unal R, Zhu B, *et al*. Adipose tissue extracellular matrix and  
51 vascular abnormalities in obesity and insulin resistance. *J Clin Endocrinol Metab*  
52 2011;**96**:E1990–1998. doi:10.1210/jc.2011-1567
- 53  
54  
55  
56  
57  
58  
59  
60

1  
2  
3  
4  
5  
6  
7  
8  
9  
10  
11  
12  
13  
14  
15  
16  
17  
18  
19  
20  
21  
22  
23  
24  
25  
26  
27  
28  
29  
30  
31  
32  
33  
34  
35  
36  
37  
38  
39  
40  
41  
42  
43  
44  
45  
46  
47  
48  
49  
50  
51  
52  
53  
54  
55  
56  
57  
58  
59  
60

For peer review only

**STROBE 2007 (v4) Statement—Checklist of items that should be included in reports of *cohort studies***

| Section/Topic            | Item # | Recommendation                                                                                                                                                                       | Reported on page # |
|--------------------------|--------|--------------------------------------------------------------------------------------------------------------------------------------------------------------------------------------|--------------------|
| Title and abstract       | 1      | (a) Indicate the study's design with a commonly used term in the title or the abstract                                                                                               | 1                  |
|                          |        | (b) Provide in the abstract an informative and balanced summary of what was done and what was found                                                                                  | 2                  |
| <b>Introduction</b>      |        |                                                                                                                                                                                      |                    |
| Background/rationale     | 2      | Explain the scientific background and rationale for the investigation being reported                                                                                                 | 4                  |
| Objectives               | 3      | State specific objectives, including any prespecified hypotheses                                                                                                                     | 4                  |
| <b>Methods</b>           |        |                                                                                                                                                                                      |                    |
| Study design             | 4      | Present key elements of study design early in the paper                                                                                                                              | 5                  |
| Setting                  | 5      | Describe the setting, locations, and relevant dates, including periods of recruitment, exposure, follow-up, and data collection                                                      | 5-7                |
| Participants             | 6      | (a) Give the eligibility criteria, and the sources and methods of selection of participants. Describe methods of follow-up                                                           | 5-7                |
|                          |        | (b) For matched studies, give matching criteria and number of exposed and unexposed                                                                                                  | -                  |
| Variables                | 7      | Clearly define all outcomes, exposures, predictors, potential confounders, and effect modifiers. Give diagnostic criteria, if applicable                                             | 5-7                |
| Data sources/measurement | 8*     | For each variable of interest, give sources of data and details of methods of assessment (measurement). Describe comparability of assessment methods if there is more than one group | 5-7                |
| Bias                     | 9      | Describe any efforts to address potential sources of bias                                                                                                                            | 5-7                |
| Study size               | 10     | Explain how the study size was arrived at                                                                                                                                            | 5-7                |
| Quantitative variables   | 11     | Explain how quantitative variables were handled in the analyses. If applicable, describe which groupings were chosen and why                                                         | 5-7                |
| Statistical methods      | 12     | (a) Describe all statistical methods, including those used to control for confounding                                                                                                | 6-7                |
|                          |        | (b) Describe any methods used to examine subgroups and interactions                                                                                                                  | 6-7                |
|                          |        | (c) Explain how missing data were addressed                                                                                                                                          | 6-7                |
|                          |        | (d) If applicable, explain how loss to follow-up was addressed                                                                                                                       | -                  |
|                          |        | (e) Describe any sensitivity analyses                                                                                                                                                | -                  |
| <b>Results</b>           |        |                                                                                                                                                                                      |                    |

|                          |     |                                                                                                                                                                                                              |       |
|--------------------------|-----|--------------------------------------------------------------------------------------------------------------------------------------------------------------------------------------------------------------|-------|
| Participants             | 13* | (a) Report numbers of individuals at each stage of study—eg numbers potentially eligible, examined for eligibility, confirmed eligible, included in the study, completing follow-up, and analysed            | -     |
|                          |     | (b) Give reasons for non-participation at each stage                                                                                                                                                         | -     |
|                          |     | (c) Consider use of a flow diagram                                                                                                                                                                           | -     |
| Descriptive data         | 14* | (a) Give characteristics of study participants (eg demographic, clinical, social) and information on exposures and potential confounders                                                                     | 7-9   |
|                          |     | (b) Indicate number of participants with missing data for each variable of interest                                                                                                                          | 7-9   |
|                          |     | (c) Summarise follow-up time (eg, average and total amount)                                                                                                                                                  | -     |
| Outcome data             | 15* | Report numbers of outcome events or summary measures over time                                                                                                                                               | 7-9   |
| Main results             | 16  | (a) Give unadjusted estimates and, if applicable, confounder-adjusted estimates and their precision (eg, 95% confidence interval). Make clear which confounders were adjusted for and why they were included | 7-9   |
|                          |     | (b) Report category boundaries when continuous variables were categorized                                                                                                                                    | 7-9   |
|                          |     | (c) If relevant, consider translating estimates of relative risk into absolute risk for a meaningful time period                                                                                             | -     |
| Other analyses           | 17  | Report other analyses done—eg analyses of subgroups and interactions, and sensitivity analyses                                                                                                               | 7-9   |
| <b>Discussion</b>        |     |                                                                                                                                                                                                              |       |
| Key results              | 18  | Summarise key results with reference to study objectives                                                                                                                                                     | 10-11 |
| <b>Limitations</b>       |     |                                                                                                                                                                                                              |       |
| Interpretation           | 20  | Give a cautious overall interpretation of results considering objectives, limitations, multiplicity of analyses, results from similar studies, and other relevant evidence                                   | 11-12 |
| Generalisability         | 21  | Discuss the generalisability (external validity) of the study results                                                                                                                                        | 10-12 |
| <b>Other information</b> |     |                                                                                                                                                                                                              |       |
| Funding                  | 22  | Give the source of funding and the role of the funders for the present study and, if applicable, for the original study on which the present article is based                                                | -     |

\*Give information separately for cases and controls in case-control studies and, if applicable, for exposed and unexposed groups in cohort and cross-sectional studies.

**Note:** An Explanation and Elaboration article discusses each checklist item and gives methodological background and published examples of transparent reporting. The STROBE checklist is best used in conjunction with this article (freely available on the Web sites of PLoS Medicine at <http://www.plosmedicine.org/>, Annals of Internal Medicine at <http://www.annals.org/>, and Epidemiology at <http://www.epidem.com/>). Information on the STROBE Initiative is available at [www.strobe-statement.org](http://www.strobe-statement.org).

# BMJ Open

## Compliance with current VTE prophylaxis guidelines and risk factors linked to complications of VTE prophylaxis in medical inpatients: a prospective cohort study in a Spanish Internal Medicine Department.

|                                 |                                                                                                                                                                                                                                                                                                                                                                                                                                                                                                                                                    |
|---------------------------------|----------------------------------------------------------------------------------------------------------------------------------------------------------------------------------------------------------------------------------------------------------------------------------------------------------------------------------------------------------------------------------------------------------------------------------------------------------------------------------------------------------------------------------------------------|
| Journal:                        | <i>BMJ Open</i>                                                                                                                                                                                                                                                                                                                                                                                                                                                                                                                                    |
| Manuscript ID                   | bmjopen-2017-021288.R3                                                                                                                                                                                                                                                                                                                                                                                                                                                                                                                             |
| Article Type:                   | Research                                                                                                                                                                                                                                                                                                                                                                                                                                                                                                                                           |
| Date Submitted by the Author:   | 01-Apr-2018                                                                                                                                                                                                                                                                                                                                                                                                                                                                                                                                        |
| Complete List of Authors:       | Novo-Veleiro, Ignacio; Complejo Hospitalario Universitario de Santiago de Compostela, Internal Medicine<br>Alvela-Suárez, Lucía; Hospital HM Rosaleda, Internal Medicine<br>Costa-Grille, Alba; Hospital Universitario de Getafe, Geriatrics<br>Suárez-Dono, Javier; Complejo Hospitalario Universitario de Santiago de Compostela, Internal Medicine<br>Ferrón-Vidan, Fernando; Complejo Hospitalario Universitario de Santiago de Compostela, Internal Medicine<br>Reino, Antonio; Complejo Hospitalario Universitario de Santiago de Compostela |
| <b>Primary Subject Heading</b>: | Haematology (incl blood transfusion)                                                                                                                                                                                                                                                                                                                                                                                                                                                                                                               |
| Secondary Subject Heading:      | Geriatric medicine, Medical management, Patient-centred medicine                                                                                                                                                                                                                                                                                                                                                                                                                                                                                   |
| Keywords:                       | Thromboembolism < CARDIOLOGY, GERIATRIC MEDICINE, Bleeding disorders & coagulopathies < HAEMATOLOGY                                                                                                                                                                                                                                                                                                                                                                                                                                                |
|                                 |                                                                                                                                                                                                                                                                                                                                                                                                                                                                                                                                                    |

SCHOLARONE™  
Manuscripts



1  
2  
3 **Title:** Compliance with current VTE prophylaxis guidelines and risk factors linked to  
4 complications of VTE prophylaxis in medical inpatients: a prospective cohort study in a  
5 Spanish Internal Medicine Department.  
6  
7  
8  
9

10  
11 **Authors:** Ignacio Novo-Veleiro<sup>1\*</sup>, Lucía Alvela-Suárez<sup>2</sup>, Alba Costa-Grille<sup>3</sup>, Javier  
12 Suárez-Dono<sup>1</sup>, Fernando Ferrón-Vidán<sup>1</sup>, Antonio Pose-Reino<sup>1</sup>.  
13  
14  
15

16  
17  
18 **Filiations:**

19  
20 <sup>1</sup> Internal Medicine Department. University Hospital of Santiago de Compostela. A  
21 Coruña. Spain.  
22  
23

24 <sup>2</sup> Internal Medicine Department. HM Rosaleda Hospital. Santiago de Compostela. A  
25 Coruña. Spain.  
26  
27

28 <sup>3</sup> Geriatrics Department. University Hospital of Getafe. Madrid. Spain.  
29  
30  
31  
32  
33  
34  
35  
36  
37  
38  
39  
40  
41  
42  
43

44 **\*Corresponding author:** Ignacio Novo-Veleiro. Internal Medicine Department.  
45 University Hospital of Santiago de Compostela. A Coruña. Spain. 15701. Tel. +34  
46 981951725. Email: ignacio.novo.veleiro@gmail.com.  
47  
48  
49  
50  
51  
52  
53  
54  
55  
56  
57  
58  
59  
60

1  
2  
3 ABSTRACT  
4

5 *Objectives:* To evaluate the degree of compliance with current guidelines regarding  
6 venous thromboembolism (VTE) prophylaxis in medical patients during admission and  
7 to identify risk factors linked to complications of VTE prophylaxis.  
8  
9

10  
11  
12 *Design:* Prospective cohort study.  
13

14  
15 *Setting:* The Internal Medicine Department of the University Hospital of Santiago de  
16 Compostela (tertiary referral hospital).  
17

18  
19  
20 *Participants:* A total of 396 hospitalized, elderly patients who did not undergo surgery  
21 and had no active or previous oral anticoagulation or low molecular weight heparin  
22 (LMWH) treatment (during the previous year) and who received VTE prophylaxis  
23 during admission.  
24  
25  
26

27  
28  
29 *Primary and secondary outcome measures:* The degree of compliance with the current  
30 guidelines was estimated by calculating PADOVA and IMPROVE indexes in all cases.  
31 We analyzed the development of the following complications: major and minor  
32 bleeding, major and minor hematoma and decrease of platelet count.  
33  
34  
35

36  
37  
38 *Results:* We found that VTE prophylaxis was correctly indicated in 88.4% of patients.  
39 We found 2 (0.5%) cases with major bleeding, 17 (4.3%) with minor bleeding, 30  
40 (7.6%) with decreased platelet count, 29 (7.3%) with major hematoma and 82 (20.7%)  
41 with minor hematoma. After multivariate logistic regression analysis, the presence of  
42 major hematomas was linked to obesity (OR=4.1; IC95% 1.8–9.2;  $P=0.001$ ),  
43 concomitant antiplatelet treatment (OR=2.7; IC95% 1.1–6.5;  $P=0.03$ ) and enoxaparin  
44 use (OR=3.5; IC95% 1.1–10.9;  $P=0.029$ ) and the presence of minor hematomas was  
45 associated with PADOVA index < 4 points (OR=3.1; IC95% 1.5–6.4;  $P=0.003$ ) and  
46 diabetes mellitus (OR=2; IC95% 1.1–3.7;  $P=0.031$ ).  
47  
48  
49  
50  
51  
52  
53  
54  
55  
56  
57  
58  
59  
60

1  
2  
3 *Conclusions:* complications during VTE prophylaxis in elderly hospitalized medical  
4 patients are frequent even with correct application of current guidelines. The main  
5 factors linked to hematomas were obesity and concomitant antiplatelet treatment, the  
6 presence of which should lead physicians to exercise extreme caution. The use of  
7 tinzaparin for VTE prophylaxis in these patients could have a better safety profile.  
8  
9  
10  
11  
12

## 13 14 15 16 STRENGTHS AND LIMITATIONS OF THIS STUDY

### 17 18 19 *Strengths:*

- 20 -Clinical study in elderly patients, who are usually excluded from large studies.
- 21
- 22 -Analysis of compliance with current guidelines for VTE prophylaxis in real-world
- 23 conditions.
- 24
- 25 -Detection of minor complications and risk factors that have usually been
- 26 underestimated in previous studies.
- 27
- 28
- 29
- 30
- 31
- 32
- 33

### 34 35 36 *Limitations:*

- 37 -Observational study conducted in only one department of a single hospital, which did
- 38 not allow for an accurate homogenization of subgroups.
- 39
- 40
- 41 -The inclusion of patients with VTE prophylaxis only could introduce selection bias.
- 42
- 43
- 44
- 45
- 46

47 FUNDING STATEMENT: this research received no specific grant from any funding  
48 agency in the public, commercial or not-for-profit sectors.  
49  
50

51  
52  
53  
54 COMPETING INTERESTS STATEMENT: all authors declare that they have no  
55 competing interests.  
56  
57  
58

## INTRODUCTION

Low molecular weight heparin (LMWH) is widely prescribed in hospitalized patients who meet high-risk criteria for venous and pulmonary embolism [1]. The criteria for prescribing LMWH have been redefined by the American College of Chest Physicians. They now place an emphasis on calculating the risk of venous thromboembolism (VTE) development and the bleeding risk before starting VTE prophylaxis on both surgical and non-surgical inpatients [2,3]. In this sense, it is worth noting that the factors linked to higher bleeding risk have been intensely analyzed in patients who have undergone surgical procedures, but there is a lack of data for non-surgery patients [4]. Moreover, the occurrence of some non-life-threatening secondary effects, such as abdominal hematomas, has been poorly studied during VTE prophylaxis in patients who have not undergone surgery [5].

The alignment of real daily clinical practice with the current recommendations is another interesting point that deserves attention. Previous studies showed an acceptable match between guidelines and clinical practice in surgical patients but, again, only a few observational studies in non-surgical patients have analyzed this fact [1,6–8].

The aims of the present study were, therefore, on the one hand, to analyze compliance with current VTE prophylaxis guidelines in non-surgical patients in an internal medicine department and, on the other hand, to describe the incidence of major and minor secondary effects with LMWH prophylaxis and to detect potential risk factors linked to them.

## PATIENTS AND METHODS

The inclusion criteria were: hospitalized non-surgical patients with no active or previous oral anticoagulation or LMWH treatment (during the previous year). There was no restriction with regard to the cause of hospital admission. In all cases, physicians indicated VTE prophylaxis with no intervention from the study staff. Written informed consent was obtained from all patients and data collection was performed through a personal interview by trained staff and a review of their electronic medical history.

Age-adjusted Charlson's index (ACI) was used to assess the comorbidity degree of the patients included [9]. We also applied the Barthel's index (BI) to calculate functional status [10], the CONUT Score (CS) to detect and establish nutritional deficiencies [11] and the Pfeiffer's test (PT) to conduct a mental status evaluation of all the patients included [12].

In light of current recommendations, the PADOVA index was calculated in all cases to check the adherence of the clinical practice to guidelines [4]. VTE prophylaxis was considered as indicated with at least 4 points in PADOVA index [13]. The IMPROVE index was used to calculate bleeding risk, with patients with at least 7 points considered as high-risk patients [14].

Chronic kidney disease (CKD) was assessed in patients with decreased glomerular filtration rate (GFR) ( $<60$  mL/min) for at least 3 months before admission, following current guidelines [15]. Acute kidney injury (AKI) was considered in patients with GFR  $< 60$  mL/min at admission without previous diagnosis of CKD. Patients with previous CKD and worsening of GFR at admission were coded as CKD exacerbation (CKDE). GFR was calculated using the 2009 CKD-Epidemiology Collaboration (EPI) creatinine equation in all cases [16].

1  
2  
3 All patients with a body mass index (BMI) over 30 kg/m<sup>2</sup> were considered  
4 obese. For the main alterations in blood count, we applied World Health Association  
5 (WHO) criteria for anemia and we classified all patients with values under 12,000/ $\mu$ L  
6 at admission as having thrombocytopenia. We considered as elevated all cases of  
7 coagulation test with an international normalized ratio (INR) over 1.2 or activated  
8 partial thromboplastin time (APTT) over 35 seconds.  
9  
10  
11  
12  
13  
14  
15

16 The heparin types available in our center for the duration of the study were only  
17 enoxaparin and tinzaparin, which are therefore the only heparins included in our  
18 analysis.  
19  
20  
21  
22

23 With regard to the analyzed complications, we defined them as follows:

24  
25 -Major bleeding: gastrointestinal or intracranial bleeding, hemoptysis, epistaxis or  
26 hematuria with a decrease of at least 2 g/dL in hemoglobin level.  
27  
28

29  
30 -Minor bleeding: hemoptysis, epistaxis or hematuria without changes in hemoglobin  
31 levels or with a decrease of less than 2 g/dL.  
32  
33

34  
35 -Platelet count decrease: loss of at least 50% compared with the baseline value.  
36  
37

38 -Major hematoma: retroperitoneal or straight abdominal muscle locations were  
39 considered as major hematoma in all cases. We also considered as major hematoma an  
40 abdominal hematoma in other locations in which a loss of at least 2 points in  
41 hemoglobin levels was implied.  
42  
43  
44  
45

46  
47 -Minor hematoma: abdominal wall hematoma (any location) with an extension of more  
48 than 5 cm without hemoglobin loss or with a hemoglobin loss lower than 2 points. We  
49 also considered as minor hematoma all abdominal wall hematomas of any extension,  
50 which caused symptoms like pain or pruritus requiring specific treatment.  
51  
52  
53  
54  
55  
56  
57  
58  
59  
60

1  
2  
3 -Pulmonary embolism (PE): we coded all cases diagnosed during the hospital stay that  
4 were undiagnosed and unsuspected at admission.  
5

6  
7 -Deep venous thrombosis (DVT): we considered all cases diagnosed during the hospital  
8 stay that were undiagnosed and unsuspected at admission.  
9  
10

11  
12 A descriptive analysis was performed by calculating qualitative-variable rates  
13 plus mean and standard deviation. We used the Chi-square test or Fisher's exact test, as  
14 appropriate (expected frequency value <5), to compare qualitative variables, and the  
15 Student's t test for quantitative variables. A multivariate logistic regression analysis was  
16 conducted to identify factors associated with complications. A *P*-value <0.05 was  
17 regarded as significant. All analyses were performed using the SPSS v. 22.0 software  
18 package (SPSS Inc., Chicago, IL, USA).  
19  
20  
21  
22  
23  
24  
25  
26

27  
28 The protocol of the present study was reviewed and approved by the Clinical  
29 Investigations Ethical Committee of Galicia.  
30  
31

### 32 33 34 35 *Patient and Public Involvement*

36  
37  
38 There was no patient or public involvement in the development of the study design,  
39 protocol, recruitment or dissemination of results.  
40  
41  
42  
43  
44

## 45 RESULTS

46  
47  
48 We included 396 consecutive inpatients who were given VTE prophylaxis during their  
49 hospital stay. Regarding gender, 51.8% were women and the global mean age was 80.7  
50 years (Standard Deviation [SD] = 11.5, Range = 22–107), 91% of patients were over 65  
51 years old. Only 32 patients (8.1%) lived in nursing homes and the average scores of the  
52  
53  
54  
55  
56  
57  
58  
59  
60

different classification tools applied at admission were: ACI 5.5 (SD = 2.2) points, BI 55.5 (SD = 35.5) points, PT 3.3 (SD = 3) mistakes and CS 6.2 (SD = 2.6) points. CKD was present in 91 (23.2%) patients and diabetes mellitus in 111 (28.3%), as well as obesity in 111 patients (28.3%). Other remarkable comorbidities were active cancer (37 patients, 9.5%) and hematological diseases (9 patients, 2.5%) The complete baseline characteristics and frequencies of the main thrombosis risk factors are detailed in Table 1.

Table 1. Global baseline characteristics and analysis of differences regarding the type of LMWH used for VTE prophylaxis.

| Variable               | Global (396) | Tinzaparin (120) | Enoxaparin (276) | P      |
|------------------------|--------------|------------------|------------------|--------|
| Male                   | 191 (48)     | 57 (47.5)        | 134 (48.5)       | 0.848  |
| Age                    | 80.7 (11.6)  | 83 (9.6)         | 79.8 (12.2)      | 0.083  |
| CKD                    | 91 (23)      | 43 (36)          | 48 (17)          | <0.001 |
| Diabetes mellitus      | 112 (28)     | 38 (32)          | 74 (27)          | 0.324  |
| Neoplasia              | 37 (9)       | 11 (9)           | 26 (9)           | 0.928  |
| Obesity                | 113 (28.5)   | 30 (25)          | 83 (30)          | 0.342  |
| Previous VTE           | 4 (1)        | 3 (2.5)          | 1 (0.4)          | 0.085  |
| 30-day surgery         | 5 (1)        | 1 (1)            | 4 (1.5)          | 0.521  |
| Stroke                 | 49 (12)      | 13 (11)          | 36 (13)          | 0.539  |
| Autoimmune disease     | 17 (4)       | 2 (2)            | 15 (5.5)         | 0.089  |
| Liver disease          | 24 (6)       | 8 (7)            | 16 (5.5)         | 0.739  |
| Antiplatelet treatment | 182 (46)     | 53 (44)          | 129 (47)         | 0.271  |
| Infectious disease     | 316 (80)     | 92 (77)          | 224 (81)         | 0.306  |
| Anemia                 | 156 (39)     | 54 (45)          | 102 (37)         | 0.116  |
| AKI                    | 95 (24)      | 41 (34)          | 54 (19.5)        | 0.002  |
| CKD exacerbation       | 79 (20)      | 39 (32.5)        | 40 (14.5)        | <0.001 |
| Heart failure          | 137 (34.5)   | 50 (42)          | 87 (31.5)        | 0.051  |
| PADOVA > 4             | 342 (86)     | 112 (93)         | 230 (83)         | 0.001  |
| IMPROVE > 7            | 24 (6)       | 9 (7.5)          | 15 (5.5)         | 0.387  |
| BARTHEL < 20           | 56 (14)      | 21 (17.5)        | 35 (13)          | 0.218  |
| PFEIFFER > 5           | 154 (39)     | 51 (42.5)        | 103 (37)         | 0.257  |

Data are showed as n (%) or mean (SD). CKD: chronic kidney disease. VTE: venous thromboembolism. AKI: acute kidney injury.

After the application of the PADOVA index, we found that VTE prophylaxis was correctly indicated in 88.4% of patients following these criteria, which means that VTE prophylaxis was prescribed in 46 low-risk patients. In the case of the IMPROVE



1  
2  
3 index, we found that 6.3% of patients had a high theoretical bleeding risk, which should  
4  
5 advise against VTE prophylaxis prescription. There were 22 patients (5.7%) who  
6  
7 fulfilled both PADOVA and IMPROVE criteria, which means concomitant high risk of  
8  
9 VTE and bleeding. We only found 2 patients (0.5%) with fewer than 4 points in the  
10  
11 PADOVA index and high bleeding risk in the IMPROVE index.  
12

13  
14 Regarding their general condition at admission, 316 (79.8%) patients presented  
15  
16 with an infection, 155 (39.1%) had anemia, 137 (34.6%) had an acute heart failure, 95  
17  
18 (24%) met AKI criteria and 79 (19.9) met CKDE criteria. In platelet count and  
19  
20 coagulation tests, 93 (23.5%) patients had elevated coagulation tests at admission and  
21  
22 27 (6.8%) had thrombocytopenia.  
23

24  
25 With regard to VTE prophylaxis, the most used LMWH was enoxaparin (69.7%  
26  
27 of cases) followed by tinzaparin (30.3%) and the mean duration was 12 (SD = 11.8)  
28  
29 days. The most commonly used treatment regimens were 4000 International Units (IU)  
30  
31 daily for enoxaparin (219 patients) and 3500 IU daily for tinzaparin (103 patients). The  
32  
33 dose adjustment in patients with CKD, CKDE or AKI was correct in all cases. We did  
34  
35 not register any episode of VTE during the study period.  
36  
37

38  
39 With regard to complications, we found 2 patients (0.5%) who presented with  
40  
41 major bleeding, 17 (4.3%) with a minor bleeding episode, 30 (7.6%) developed a  
42  
43 platelet count decrease, 29 (7.3%) had a major hematoma (9 located in straight  
44  
45 abdominal muscles and 20 in other abdominal locations) and 82 (20.7%) had a minor  
46  
47 hematoma. All patients who developed complications were managed through  
48  
49 conservative treatment and the course was favorable in all cases. After the univariate  
50  
51 analysis, we found an association between minor bleeding and the presence of anemia at  
52  
53 admission and AKI. In the case of major hematomas, this analysis showed significant  
54  
55 differences in patients with obesity, concomitant antiplatelet treatment, an infection or  
56  
57  
58  
59

1  
2  
3 heart failure as main cause of admission and the use of enoxaparin. With regard to  
4  
5 minor hematomas, we found an association with diabetes and a PADOVA index lower  
6  
7 than 4 points. Finally, a platelet count decrease was only linked to an infection as the  
8  
9 cause of admission and it was not associated with the other analyzed complications.

10  
11  
12 After multivariable analysis, none of the variables showed an association with  
13  
14 minor bleeding or platelet count decrease. The presence of major hematomas was linked  
15  
16 to obesity (OR = 4.1; IC 95% 1.8 – 9.2;  $P = 0.001$ ), concomitant antiplatelet treatment  
17  
18 (OR = 2.7; IC 95% 1.1 – 6.5;  $P = 0.03$ ) and enoxaparin use (OR = 3.5; IC 95% 1.1 –  
19  
20 10.9;  $P = 0.029$ ) and the presence of minor hematomas was associated with the absence  
21  
22 of indication of VTE prophylaxis following recommendations (PADOVA index < 4  
23  
24 points) (OR = 3.1; IC 95% 1.5 – 6.4;  $P = 0.003$ ) and the presence of Diabetes Mellitus  
25  
26 (OR = 2; IC 95% 1.1 – 3.7;  $P = 0.031$ ).

27  
28  
29 In view of these results, we performed a sub-analysis to compare the clinical  
30  
31 profile of patients who received enoxaparin and tinzaparin, which showed significant  
32  
33 differences regarding renal function only, as shown in Table 1.  
34  
35  
36  
37  
38

## 39 DISCUSSION

40  
41  
42 The present study shows, for the first time to our knowledge, an exhaustive analysis of  
43  
44 clinically relevant complications and their main risk factors during VTE prophylaxis in  
45  
46 non-surgical patients.  
47

48  
49 The high degree of observed compliance with current guidelines in clinical  
50  
51 practice is remarkable. There is, however, a narrow margin for improvement,  
52  
53 particularly in the case of over-prescription in low-risk patients. Our study included  
54  
55 only patients given VTE prophylaxis during hospital stay, which makes comparison  
56  
57  
58  
59  
60

1  
2  
3 with studies such as ENDORSE or AVAIL ME difficult because they showed lower  
4 percentages of correct application of recommendations, even as low as below 50%  
5  
6 [17,18].  
7  
8

9  
10 Another relevant difference of our study is that it is exclusively confined to  
11 medical patients, as well as the extremely high age and degree of comorbidity of our  
12 cohort, compared with larger series in which patients with a mean age more than 10  
13 years younger and very low rates of multiple comorbidity were included [19,20].  
14  
15  
16

17  
18 The absence of VTE cases in our study reflects a high efficacy of VTE  
19 prophylaxis in medical patients, which has been studied extensively and supported by  
20 high-quality evidence [21,22].  
21  
22  
23

24  
25 With respect to complications, we analyzed minor complications such as  
26 hematomas that are usually undervalued by physicians, but are important for patients.  
27 Indeed, we consider that our results could help physicians to improve their daily clinical  
28 practice and the patient's experience during a hospital admission by adding tools to  
29 detect patients at risk of developing these complications.  
30  
31  
32

33  
34 Bleeding episodes were infrequent, but the association between anemia and  
35 minor bleeding could reflect the existence of previous digestive tract bleeding,  
36 increased during admission by LMWH. The association with AKI could be explained  
37 by a heparin over-effect in these patients, although we did not detect significant rates of  
38 unadjusted dosage in our cohort. In fact, an increased bleeding risk was one of the main  
39 risk factors considered on the IMPROVE score, although anemia was not a useful  
40 marker of bleeding risk in that study [14]. Thus, our results could contribute to  
41 expanding the tools available to identify patients with high bleeding risk before  
42 prescribing VTE prophylaxis.  
43  
44  
45  
46  
47  
48  
49  
50  
51  
52  
53  
54  
55  
56  
57  
58  
59  
60

1  
2  
3 In the case of major hematomas, we must underscore the relatively high  
4 percentage of patients who developed these complications. Despite the clinical  
5 relevance of abdominal and retroperitoneal hematomas, these complications were not  
6 analyzed in any cohort study, and thus we can only compare our results with case  
7 reports [14,18,23,24]. In this sense, previous reports suggested an estimated incidence  
8 of 5% for abdominal hematomas in patients receiving VTE prophylaxis, which could be  
9 comparable to our results [25]. With regard to risk factors, previous studies showed that  
10 elderly patients had a higher risk of abdominal hematomas [23,25,26]; we did detect  
11 such an association, probably because of the small number of patients aged less than 65  
12 years. Concomitant antiplatelet treatment has been identified as a risk factor linked to  
13 hematomas by other authors because of its synergic action with LMWH, and our  
14 findings reinforce the importance of assessing the need to maintain these drugs during  
15 hospital admission in elderly patients [23,25,26]. Obesity has also been described as a  
16 risk factor in previous studies [25,27], and this relationship could be due to an adipose  
17 tissue dysfunction in obese patients, linked to an abnormal subcutaneous vascularization  
18 and extracellular matrix changes [28–30]. These alterations lead to a higher risk of local  
19 hematomas in obese patients under VTE prophylaxis, independently of the plasmatic  
20 levels of LMWH achieved [26].  
21  
22  
23  
24  
25  
26  
27  
28  
29  
30  
31  
32  
33  
34  
35  
36  
37  
38  
39  
40

41  
42 As to the different types of LMWH used in our study, we found a lower risk of  
43 major hematomas with tinzaparin as the only significant difference. Interestingly, the  
44 characteristics of patients treated with both LWMHs were different with regard to renal  
45 function, so the use of tinzaparin in patients with poorer renal function could have  
46 alerted physicians to the need for better dose adjustment. Thus, this could be considered  
47 as a potential selection bias that should be taken into account in the interpretation of our  
48 results. Despite this, a potential superior safety profile in elderly patients with high  
49  
50  
51  
52  
53  
54  
55  
56  
57  
58  
59  
60

1  
2  
3 comorbidity emerges and even differences in device, needles and mode of  
4 administration should be considered. Further studies will be necessary to properly  
5 establish this difference.  
6  
7  
8

9  
10 With regard to minor hematomas, it is remarkable that this complication is not  
11 usually considered clinically relevant. However, we decided to include it because we  
12 considered it to be highly relevant for our patients. The association with a PADOVA  
13 index lower than 4 points cannot be considered as a risk factor itself, but it helps us to  
14 highlight the importance of correct application of VTE prophylaxis guidelines. Diabetes  
15 mellitus has not been previously described as a risk factor for abdominal hematoma  
16 development but microvascular diabetic complications might underlie this association  
17 [25].  
18  
19  
20  
21  
22  
23  
24  
25  
26

27  
28 Despite the high percentage of patients with variations in coagulation tests  
29 (23.5%), we found no association between these variations and the related  
30 complications. This could be due to the little relevance of most variations in coagulation  
31 tests, consisting of small increments of INR or APTT.  
32  
33  
34  
35

36  
37 In light of our results, we think that the presence of any risk factor for the  
38 development of major or minor complications linked to VTE prophylaxis should lead  
39 physicians to careful consideration of the indication, dosage and time of treatment  
40 before VTE prophylaxis is prescribed, particularly in elderly patients.  
41  
42  
43  
44  
45  
46  
47

## 48 CONCLUSIONS

49  
50  
51 The incidence of complications developing during VTE prophylaxis in elderly  
52 hospitalized medical patients is higher than that expected in other populations even  
53 when the current guidelines are correctly applied. The main factors linked to hematomas  
54  
55  
56  
57  
58  
59  
60

1  
2  
3 in our cohort were obesity and concomitant antiplatelet treatment, the presence of which  
4 should lead physicians to exercise extreme caution. The safety profile of tinzaparin for  
5 VTE prophylaxis in these patients could be improved.  
6  
7  
8  
9

#### 10 11 12 AUTHOR'S CONTRIBUTIONS 13

14 -Study concept and design: Drs. Antonio Pose-Reino, Ignacio Novo-Veleiro and Lucía  
15 Alvela-Suárez.  
16

17 -Acquisition of subjects and/or data: Drs. Ignacio Novo-Veleiro, Lucía Alvela-Suárez  
18 and Alba Costa-Grille.  
19

20 -Analysis and interpretation of data: Drs. Ignacio Novo-Veleiro, Javier Suárez-Dono,  
21 Fernando Ferrón-Vidán and Antonio Pose-Reino.  
22

23 -Preparation of manuscript: Drs. Ignacio Novo-Veleiro, Lucía Alvela-Suárez and  
24 Antonio Pose-Reino.  
25  
26  
27

28  
29  
30  
31  
32  
33  
34  
35 DATA SHARING STATEMENT: Technical appendix, statistical code, and dataset will  
36 be available from the Dryad repository if required.  
37  
38  
39

40  
41  
42 FUNDING STATEMENT: this research received no specific grant from any funding  
43 agency in the public, commercial or not-for-profit sectors.  
44  
45  
46  
47  
48

49  
50 COMPETING INTERESTS STATEMENT: all authors declare that they have no  
51 competing interests.  
52  
53  
54  
55  
56  
57  
58  
59  
60

## REFERENCES

- 1 Nieto Rodríguez JA, ENDORSE. [Venous thromboembolism risk and antithrombotic prophylaxis among patients admitted to Spanish hospitals (ENDORSE study)]. *Med Clin (Barc)* 2009;**133**:1–7. doi:10.1016/j.medcli.2009.01.040
- 2 Gould MK, Garcia DA, Wren SM, *et al.* Prevention of VTE in nonorthopedic surgical patients: Antithrombotic Therapy and Prevention of Thrombosis, 9th ed: American College of Chest Physicians Evidence-Based Clinical Practice Guidelines. *Chest* 2012;**141**:e227S–e277S. doi:10.1378/chest.11-2297
- 3 Falck-Ytter Y, Francis CW, Johanson NA, *et al.* Prevention of VTE in orthopedic surgery patients: Antithrombotic Therapy and Prevention of Thrombosis, 9th ed: American College of Chest Physicians Evidence-Based Clinical Practice Guidelines. *Chest* 2012;**141**:e278S–e325S. doi:10.1378/chest.11-2404
- 4 Kahn SR, Lim W, Dunn AS, *et al.* Prevention of VTE in nonsurgical patients: Antithrombotic Therapy and Prevention of Thrombosis, 9th ed: American College of Chest Physicians Evidence-Based Clinical Practice Guidelines. *Chest* 2012;**141**:e195S–e226S. doi:10.1378/chest.11-2296
- 5 Decousus H, Tapon VF, Bergmann J-F, *et al.* Factors at admission associated with bleeding risk in medical patients: findings from the IMPROVE investigators. *Chest* 2011;**139**:69–79. doi:10.1378/chest.09-3081
- 6 Ruiz-Artacho P, Pérez Peña C, Iriarte A, *et al.* [Adequation of thromboprophylaxis during former admission in patients attended in emergencies with thromboembolic disease]. *Med Clin (Barc)* 2013;**141**:130–1. doi:10.1016/j.medcli.2012.12.014
- 7 Gallardo Jiménez P, Guijarro Merino R, Vallejo Herrera V, *et al.* [Assessment of venous thromboembolism risk in hospitalized medical patients. Concordance between PRETEMED guide and the recommendations of the viii conference of the American College of Chest Physicians]. *Med Clin (Barc)* 2012;**139**:467–72. doi:10.1016/j.medcli.2011.07.022
- 8 Borobia AM, Fernández Capitán C, Iniesta Arandia N, *et al.* [Risk of thromboembolic events and evaluation of the use of venous thromboembolism prophylaxis in hospitalized medical patients and after discharge]. *Rev Clin Esp* 2009;**209**:15–20.
- 9 Charlson ME, Pompei P, Ales KL, *et al.* A new method of classifying prognostic comorbidity in longitudinal studies: development and validation. *J Chronic Dis* 1987;**40**:373–83.
- 10 Mahoney FI, Barthel DW. FUNCTIONAL EVALUATION: THE BARTHEL INDEX. *Md State Med J* 1965;**14**:61–5.
- 11 Ignacio de Ulíbarri J, González-Madroño A, de Villar NGP, *et al.* CONUT: a tool for controlling nutritional status. First validation in a hospital population. *Nutr Hosp* 2005;**20**:38–45.
- 12 Pfeiffer E. A short portable mental status questionnaire for the assessment of organic brain deficit in elderly patients. *J Am Geriatr Soc* 1975;**23**:433–41.
- 13 Barbar S, Noventa F, Rossetto V, *et al.* A risk assessment model for the identification of hospitalized medical patients at risk for venous thromboembolism: the

1  
2  
3 Padua Prediction Score. *J Thromb Haemost JTH* 2010;**8**:2450–7. doi:10.1111/j.1538-  
4 7836.2010.04044.x

5 14 Hostler DC, Marx ES, Moores LK, *et al.* Validation of the International Medical  
6 Prevention Registry on Venous Thromboembolism Bleeding Risk Score. *Chest*  
7 2016;**149**:372–9. doi:10.1378/chest.14-2842

8  
9 15 National Guideline Clearinghouse (NGC). Guideline summary: KDIGO 2012  
10 clinical practice guideline for the evaluation and management of chronic kidney disease.  
11 In: National Guideline Clearinghouse (NGC) [Web site]. Rockville (MD): Agency for  
12 Healthcare Research and Quality (AHRQ); 2013 Jan 01. [cited 2017 Jun 29]. Available:  
13 <https://www.guideline.gov>.  
14

15 16 Levey AS, Stevens LA, Schmid CH, *et al.* A new equation to estimate  
16 glomerular filtration rate. *Ann Intern Med* 2009;**150**:604–12.

17 17 Taher AT, Aoun J, Salameh P. The AVAIL ME study: a multinational survey of  
18 VTE risk and prophylaxis. *J Thromb Thrombolysis* 2011;**31**:47–56.  
19 doi:10.1007/s11239-010-0492-2  
20

21 18 Cohen AT, Tapson VF, Bergmann J-F, *et al.* Venous thromboembolism risk and  
22 prophylaxis in the acute hospital care setting (ENDORSE study): a multinational cross-  
23 sectional study. *Lancet Lond Engl* 2008;**371**:387–94. doi:10.1016/S0140-  
24 6736(08)60202-0  
25

26 19 Nieto JA, Cámara T, Camacho I, *et al.* Venous thromboembolism prophylaxis in  
27 acutely ill hospitalized medical patients. A retrospective multicenter study. *Eur J Intern*  
28 *Med* 2014;**25**:717–23. doi:10.1016/j.ejim.2014.07.005  
29

30 20 Tapson VF, Decousus H, Pini M, *et al.* Venous thromboembolism prophylaxis  
31 in acutely ill hospitalized medical patients: findings from the International Medical  
32 Prevention Registry on Venous Thromboembolism. *Chest* 2007;**132**:936–45.  
33 doi:10.1378/chest.06-2993  
34

35 21 Francis CW. Clinical practice. Prophylaxis for thromboembolism in hospitalized  
36 medical patients. *N Engl J Med* 2007;**356**:1438–44. doi:10.1056/NEJMcp067264  
37

38 22 Dentali F, Douketis JD, Gianni M, *et al.* Meta-analysis: anticoagulant  
39 prophylaxis to prevent symptomatic venous thromboembolism in hospitalized medical  
40 patients. *Ann Intern Med* 2007;**146**:278–88.

41 23 Triscott J, Mercer S, Tian PGJ, *et al.* Retroperitoneal haematoma associated with  
42 enoxaparin use in an elderly woman with chronic kidney disease. *BMJ Case Rep*  
43 2015;**2015**. doi:10.1136/bcr-2015-211699  
44

45 24 Madridano O, Martín Del Pozo M, Masso P, *et al.* [Hematoma of the rectus  
46 abdominis muscle in patients treated with low-molecular-weight heparin: four clinical  
47 cases]. *Rev Clin Esp* 2011;**211**:109–10. doi:10.1016/j.rce.2010.09.007  
48

49 25 Nourbakhsh E, Anvari R, Nugent K. Abdominal wall hematomas associated  
50 with low-molecular-weight heparins: an important complication in older adults. *J Am*  
51 *Geriatr Soc* 2011;**59**:1543–5. doi:10.1111/j.1532-5415.2011.03529.x  
52

53 26 Macías-Robles MD, Peliz MG, Gonzalez-Ordóñez AJ. Prophylaxis with  
54 enoxaparin can produce a giant abdominal wall haematoma when associated with low  
55 doses of aspirin among elderly patients suffering cough attacks. *Blood Coagul*  
56 *Fibrinolysis Int J Haemost Thromb* 2005;**16**:217–9.  
57  
58  
59



- 1  
2  
3 27 Goldstein JM, Sebire D. Abdominal wall haematoma in the obese: a dangerous  
4 phenomenon. *J Surg Case Rep* 2013;**2013**. doi:10.1093/jscr/rjt060  
5  
6 28 Blüher M. Adipose tissue dysfunction in obesity. *Exp Clin Endocrinol Diabetes*  
7 *Off J Ger Soc Endocrinol Ger Diabetes Assoc* 2009;**117**:241–50. doi:10.1055/s-0029-  
8 1192044  
9  
10 29 Baptista LS, da Silva KR, da Pedrosa CSG, *et al*. Adipose tissue of control and  
11 ex-obese patients exhibit differences in blood vessel content and resident mesenchymal  
12 stem cell population. *Obes Surg* 2009;**19**:1304–12. doi:10.1007/s11695-009-9899-2  
13  
14 30 Spencer M, Unal R, Zhu B, *et al*. Adipose tissue extracellular matrix and  
15 vascular abnormalities in obesity and insulin resistance. *J Clin Endocrinol Metab*  
16 2011;**96**:E1990–1998. doi:10.1210/jc.2011-1567  
17  
18  
19  
20  
21  
22  
23  
24  
25  
26  
27  
28  
29  
30  
31  
32  
33  
34  
35  
36  
37  
38  
39  
40  
41  
42  
43  
44  
45  
46  
47  
48  
49  
50  
51  
52  
53  
54  
55  
56  
57  
58  
59  
60

**STROBE 2007 (v4) Statement—Checklist of items that should be included in reports of *cohort studies***

| Section/Topic                | Item # | Recommendation                                                                                                                                                                       | Reported on page # |
|------------------------------|--------|--------------------------------------------------------------------------------------------------------------------------------------------------------------------------------------|--------------------|
| Title and abstract           | 1      | (a) Indicate the study's design with a commonly used term in the title or the abstract                                                                                               | 1                  |
|                              |        | (b) Provide in the abstract an informative and balanced summary of what was done and what was found                                                                                  | 2                  |
| <b>Introduction</b>          |        |                                                                                                                                                                                      |                    |
| Background/rationale         | 2      | Explain the scientific background and rationale for the investigation being reported                                                                                                 | 4                  |
| Objectives                   | 3      | State specific objectives, including any prespecified hypotheses                                                                                                                     | 4                  |
| <b>Methods</b>               |        |                                                                                                                                                                                      |                    |
| Study design                 | 4      | Present key elements of study design early in the paper                                                                                                                              | 5                  |
| Setting                      | 5      | Describe the setting, locations, and relevant dates, including periods of recruitment, exposure, follow-up, and data collection                                                      | 5-7                |
| Participants                 | 6      | (a) Give the eligibility criteria, and the sources and methods of selection of participants. Describe methods of follow-up                                                           | 5-7                |
|                              |        | (b) For matched studies, give matching criteria and number of exposed and unexposed                                                                                                  | -                  |
| Variables                    | 7      | Clearly define all outcomes, exposures, predictors, potential confounders, and effect modifiers. Give diagnostic criteria, if applicable                                             | 5-7                |
| Data sources/<br>measurement | 8*     | For each variable of interest, give sources of data and details of methods of assessment (measurement). Describe comparability of assessment methods if there is more than one group | 5-7                |
| Bias                         | 9      | Describe any efforts to address potential sources of bias                                                                                                                            | 5-7                |
| Study size                   | 10     | Explain how the study size was arrived at                                                                                                                                            | 5-7                |
| Quantitative variables       | 11     | Explain how quantitative variables were handled in the analyses. If applicable, describe which groupings were chosen and why                                                         | 5-7                |
| Statistical methods          | 12     | (a) Describe all statistical methods, including those used to control for confounding                                                                                                | 6-7                |
|                              |        | (b) Describe any methods used to examine subgroups and interactions                                                                                                                  | 6-7                |
|                              |        | (c) Explain how missing data were addressed                                                                                                                                          | 6-7                |
|                              |        | (d) If applicable, explain how loss to follow-up was addressed                                                                                                                       | -                  |
|                              |        | (e) Describe any sensitivity analyses                                                                                                                                                | -                  |
| <b>Results</b>               |        |                                                                                                                                                                                      |                    |

|                          |     |                                                                                                                                                                                                              |       |
|--------------------------|-----|--------------------------------------------------------------------------------------------------------------------------------------------------------------------------------------------------------------|-------|
| Participants             | 13* | (a) Report numbers of individuals at each stage of study—eg numbers potentially eligible, examined for eligibility, confirmed eligible, included in the study, completing follow-up, and analysed            | -     |
|                          |     | (b) Give reasons for non-participation at each stage                                                                                                                                                         | -     |
|                          |     | (c) Consider use of a flow diagram                                                                                                                                                                           | -     |
| Descriptive data         | 14* | (a) Give characteristics of study participants (eg demographic, clinical, social) and information on exposures and potential confounders                                                                     | 7-9   |
|                          |     | (b) Indicate number of participants with missing data for each variable of interest                                                                                                                          | 7-9   |
|                          |     | (c) Summarise follow-up time (eg, average and total amount)                                                                                                                                                  | -     |
| Outcome data             | 15* | Report numbers of outcome events or summary measures over time                                                                                                                                               | 7-9   |
| Main results             | 16  | (a) Give unadjusted estimates and, if applicable, confounder-adjusted estimates and their precision (eg, 95% confidence interval). Make clear which confounders were adjusted for and why they were included | 7-9   |
|                          |     | (b) Report category boundaries when continuous variables were categorized                                                                                                                                    | 7-9   |
|                          |     | (c) If relevant, consider translating estimates of relative risk into absolute risk for a meaningful time period                                                                                             | -     |
| Other analyses           | 17  | Report other analyses done—eg analyses of subgroups and interactions, and sensitivity analyses                                                                                                               | 7-9   |
| <b>Discussion</b>        |     |                                                                                                                                                                                                              |       |
| Key results              | 18  | Summarise key results with reference to study objectives                                                                                                                                                     | 10-11 |
| <b>Limitations</b>       |     |                                                                                                                                                                                                              |       |
| Interpretation           | 20  | Give a cautious overall interpretation of results considering objectives, limitations, multiplicity of analyses, results from similar studies, and other relevant evidence                                   | 11-12 |
| Generalisability         | 21  | Discuss the generalisability (external validity) of the study results                                                                                                                                        | 10-12 |
| <b>Other information</b> |     |                                                                                                                                                                                                              |       |
| Funding                  | 22  | Give the source of funding and the role of the funders for the present study and, if applicable, for the original study on which the present article is based                                                | -     |

\*Give information separately for cases and controls in case-control studies and, if applicable, for exposed and unexposed groups in cohort and cross-sectional studies.

**Note:** An Explanation and Elaboration article discusses each checklist item and gives methodological background and published examples of transparent reporting. The STROBE checklist is best used in conjunction with this article (freely available on the Web sites of PLoS Medicine at <http://www.plosmedicine.org/>, Annals of Internal Medicine at <http://www.annals.org/>, and Epidemiology at <http://www.epidem.com/>). Information on the STROBE Initiative is available at [www.strobe-statement.org](http://www.strobe-statement.org).
